# Supplementary material for: A Web-Based Application for Personalized Ecological Momentary Assessment in Psychiatric Care: User-Centered Development of the PETRA Application
Source: PubMed Central journal article supplement (PMC9399881; doi:10.2196/36430), 2022-08-09
Supplement: mental_v9i8e36430_app1.pdf [file mental_v9i8e36430_app1.pdf]

SUPPLEMENTARY MATERIALS FOR:

Personalized Treatment by Real-time Assessment (PETRA): User-centered development of a web-application for personalized diaries in psychiatric care

Fionneke M. Bos, PhD<sup>\*1,2</sup>, Lino von Klipstein, MSc<sup>2</sup>, Ando C. Emerencia<sup>3</sup>, PhD, Erwin Veermans, MSc<sup>2</sup>, Tom Verhage<sup>2</sup>, Evelien Snippe, PhD<sup>2</sup>, Bennard Doornbos, MD PhD<sup>4</sup>, Grietje Hadders-Prins<sup>1</sup>, Marieke Wichers, PhD<sup>2</sup>, Harriëtte Riese, PhD<sup>2</sup>

<sup>1</sup> University of Groningen, University Medical Center Groningen, Department of Psychiatry, Groningen, Rob Giel Research Center, The Netherlands

<sup>2</sup> University of Groningen, University Medical Center Groningen, Department of Psychiatry, Interdisciplinary Center Psychopathology and Emotion regulation (ICPE), Groningen, The Netherlands

<sup>3</sup> University of Groningen, Research Support, Faculty of Behavioural and Social Sciences, Groningen, The Netherlands

<sup>4</sup> Lentis Research, Groningen, The Netherlands

\*Corresponding author:

Fionneke M. Bos, PhD, University of Groningen, University Medical Centre Groningen, Department of Psychiatry, PO Box 30.001, 9700 RB, Groningen, The Netherlands. Phone: +31 50 361 4860, e-mail: f.m.bos01@umcg.nl.

## Contents

|                                                                                    |    |
|------------------------------------------------------------------------------------|----|
| Brief introduction to the Supplementary Materials                                  | 3  |
| S1. Interview guides for the focus groups, interviews, and usability sessions      | 4  |
| S2. Quotes of clients and clinicians on the requirements for a web-based EMA tool  | 7  |
| S3. Overview of goals, subgoals, the matching diary schedule, and diary constructs | 9  |
| S4. Further specifications of the diary schedules                                  | 11 |
| S5. Matching symptom profiles with diary constructs                                | 12 |
| S6. Burden indicator                                                               | 13 |
| S7. Features of the decision aid and feedback module                               | 15 |
| S8. Design of the feedback module                                                  | 16 |
| S9. EMA diary items                                                                | 18 |
| Semi-random beep schedule 5, 7, or 10 times per day                                | 20 |
| Fixed beep schedule 3, 5, 7, or 10 times per day                                   | 37 |
| Once-per-day evening schedule                                                      | 54 |
| Once-per-day morning schedule                                                      | 61 |
| References                                                                         | 63 |

## Brief introduction to the Supplementary Materials

In the Supplementary Materials, we will fully share all material that we have developed for PETRA, in the hope this aids other researchers and software platforms in their efforts to bring EMA to clinical practice.

S1 and S2 provide more background for the results of Phase 1-2. S3-S9 provide more details on the various components of the decision aid, EMA schedules, and feedback module of PETRA.

Like explained in the main manuscript, there are four possible EMA schedules in PETRA:

1. **Semi-random schedule** (5, 7 or 10 assessments per day). In this schedule, participants are prompted in semi-random assessment blocks spread out over the day.
2. **Fixed schedule** (3, 5, 7 or 10 assessments per day). In this schedule, participants are prompted at fixed moments throughout the day.
3. **Once-per-day evening schedule**. In this schedule, participants are prompted only once each day, in the evening.
4. **Once-per-day morning schedule**. In this schedule, participants are prompted only once each day, in the morning.

The choices for each schedule depend on the personal 1) goal of the EMA, 2) symptom profile, and 3) perceived burden of each client. In the next pages, we outline the preferred EMA schedules for each goal and symptom profile. We also describe the relevant diary constructs for each goal and symptom profile, and provide the background for the burden indicator. We further share how specific needs of clients and clinicians were translated into specific features of the decision aid and feedback module. Finally, we provide our full EMA item sets for each diary schedule.

## S1. Interview guides for the focus groups, interviews, and usability sessions

### Phase 1-2: identifying requirements of clients and clinicians

The data gathered in this phase belonged to one of two studies [1, 2].

The interview guide below was previously published in [1]. Clients and clinicians were asked to reflect on the use of EMA in clinical care in interviews and focus groups, and offer suggestions on how EMA could optimally be implemented.

#### Interview guide for clients and clinicians.

| Question                                                                                                                                                               | Specific prompts                                                     |
|------------------------------------------------------------------------------------------------------------------------------------------------------------------------|----------------------------------------------------------------------|
| 1. What do you think of EMA?                                                                                                                                           |                                                                      |
| 2. To what extent would you use EMA yourself?                                                                                                                          | How?                                                                 |
| 3. What could be possible consequences of using EMA?                                                                                                                   |                                                                      |
| 4. Do you see possible risks or downsides to EMA?                                                                                                                      |                                                                      |
| 5. <i>Patients</i> : do you have an example of when you would use EMA yourself?<br><i>Clinicians</i> : do you have an example of a patient where you could use EMA?    |                                                                      |
| 6. <i>Clinicians</i> : are there patients where you would decide against using EMA?                                                                                    | What kind of patients? Why?                                          |
| 7. <i>Patients</i> : would the way you get mental health care change through EMA?<br><i>Clinicians</i> : would the way you give mental health care change through EMA? | How?                                                                 |
| 8. How do you view the implementation of EMA in mental health care?                                                                                                    | Could you identify pitfalls?                                         |
| 9. What would you want to do with EMA-derived feedback?                                                                                                                |                                                                      |
| 10. <i>Patients</i> : How would you want to receive EMA-derived feedback?<br><i>Clinicians</i> : How would you discuss the EMA-derived feedback?                       | <i>Patients</i> : Do you discuss it with your clinician or not? How? |
| 11. What kind of questions would you want to ask in the EMA-diaries?                                                                                                   |                                                                      |
| 12. What kind of clinical questions could you answer with EMA?                                                                                                         |                                                                      |

*Note: examples of generic prompts: “what does [...] mean for you?”, “can you elaborate?”, “what do you mean by [...]?”, “can you give an example of [...]?”*

The second interview guide was previously published as well [2]. In this study, clients with bipolar disorder participated in an EMA protocol for four months, and received five EMA assessments per day. Clients and their clinicians were then interviewed on their experiences with adding EMA to their treatment.

## Interview guide for clients.

| Question                                                                                             | Specific prompts                                                           |
|------------------------------------------------------------------------------------------------------|----------------------------------------------------------------------------|
| 1. What was it like to participate in this study? How do you reflect on the study?                   |                                                                            |
| 2. If I would begin EMA myself, how would you explain it to me?                                      |                                                                            |
| 3. When would you recommend EMA?                                                                     |                                                                            |
| 4. If you could design the EMA and EMA-feedback yourself, with total freedom, how would you do that? | What would you change? What would stay the same?                           |
| 5. What was your experience with filling in the EMA diaries?                                         | Can you recall positive experiences? Negative experiences?                 |
| 6. What was your experience with the EMA-feedback?                                                   | What was your experience with discussing the feedback with your clinician? |
| 7. Was your participation in the study beneficial in any way?                                        | How?                                                                       |
| 8. Did your participation change anything in your daily life?                                        |                                                                            |
| 9. If you would not have participated in this study, what would you have missed?                     |                                                                            |
| 10. Did the EMA-feedback affect your treatment?                                                      |                                                                            |
| 11. What would you say if we would include EMA standard in treatment?                                |                                                                            |

*Note: examples of generic prompts: “what does [...] mean for you?”, “can you elaborate?”, “what do you mean by [...]?”, “can you give an example of [...]?”*

## Interview guide for clinicians.

| Question                                                                                             | Specific prompts                                                        |
|------------------------------------------------------------------------------------------------------|-------------------------------------------------------------------------|
| 1. What was it like to participate in this study as a clinician? How do you reflect on the study?    |                                                                         |
| 2. When would you recommend EMA?                                                                     |                                                                         |
| 3. If you could design the EMA and EMA-feedback yourself, with total freedom, how would you do that? | What would you change? What would stay the same?                        |
| 4. What was your experience with the EMA-feedback?                                                   | What was your experience with discussing the feedback with your client? |
| 5. Was the EMA-feedback beneficial to you in any way?                                                | How?                                                                    |
| 6. Was the EMA-feedback beneficial to your client in any way?                                        | How?                                                                    |
| 7. Did the EMA-feedback affect the way you provided treatment to the client?                         | How?                                                                    |
| 8. If you would not have participated in this study, what would you have missed?                     |                                                                         |
| 9. What would you say if we would include EMA standard in treatment?                                 |                                                                         |

*Note: examples of generic prompts: “what does [...] mean for you?”, “can you elaborate?”, “what do you mean by [...]?”, “can you give an example of [...]?”*

### Phase 3: development of PETRA prototypes

Finally, we included the interview guides for the usability sessions with clients and clinicians. These sessions were more structured according to goals and associated questions, which are outlined below.

Interview guide for usability sessions with clients and clinicians.

| Goal                                                                                                                         | Specific questions                                                                                                                                                                                                                       |
|------------------------------------------------------------------------------------------------------------------------------|------------------------------------------------------------------------------------------------------------------------------------------------------------------------------------------------------------------------------------------|
| 1. Gain a shared understanding of what EMA is and what the added benefit could be for clinical practice                      | Can you tell us what you know about personalized EMA diaries? What is your experience with it?                                                                                                                                           |
| 2. Introduce participants to the goal of PETRA: to implement personalized EMA diaries in clinical practice                   | What is your first response?                                                                                                                                                                                                             |
| 3. Understand the expectations of participants for PETRA                                                                     | What do you expect of PETRA? Do you see added value of PETRA, for yourself or the other (client or clinician)? Is PETRA always usable, or only in certain stages of care? Can you identify pitfalls or areas that require our attention? |
| 4. Gain feedback on prototypes of PETRA. We walk through PETRA prototypes together. For each page, we ask several questions. | What do you see on the screen? What are your thoughts? What would you click on? What do you miss? What would you have expected to see here?                                                                                              |
| 5. Evaluate the PETRA prototypes in relation to daily clinical practice                                                      | Does PETRA meet your expectations? What is your general feeling, positive or negative? What should be changed to improve your evaluation? Would you use EMA in your daily clinical practice? Why (not)?                                  |
| 6. Final thoughts and further steps                                                                                          | Do you have final thoughts? Do you want to be kept informed on our progress? Can we approach you again in the future for a user session?                                                                                                 |

## S2. Quotes of clients and clinicians on the requirements for a web-based EMA tool

Selected (translated) quotes from clients and clinicians on the requirements of a web-based EMA tool.

| <b>Requirement</b>         | <b>Clients</b>                                                                                                                                                                                                                                                                                                                                | <b>Clinicians</b>                                                                                                                                                                                                                                                                                                                                                                                                                           |
|----------------------------|-----------------------------------------------------------------------------------------------------------------------------------------------------------------------------------------------------------------------------------------------------------------------------------------------------------------------------------------------|---------------------------------------------------------------------------------------------------------------------------------------------------------------------------------------------------------------------------------------------------------------------------------------------------------------------------------------------------------------------------------------------------------------------------------------------|
| <b>Personalization</b>     | ID11: Yes, I don't think it should be a standard item set, but that it should fit with your treatment. It's important to bring that in line with each other.<br>ID13: A bit custom-made, right.<br>ID10: Yes, exactly.                                                                                                                        | ID34: Maybe you should be able to remove certain items because that is not relevant to that person. I can imagine that. That you make a selection, select items, like 'that should be in there, that shouldn't be in there'.                                                                                                                                                                                                                |
|                            | ID11: But also that, at a certain point... There's that item, "I feel anxious", I think. Well, I've you've been treated for that, and the anxiety is gone, then you should be able to say 'I'll remove an item from my diary'. That saves another three questions.                                                                            | ID41: That you can add, every week, if you see people recover from the depression, that you can add some elements every week. So you say: 'can you go try swimming again this week, once or twice this week, and that you then add that element to the assessment. And then after a week, you can say 'right, the swimming went well, let's continue that. What else can you do this week?' And then add another element to the assessment. |
| <b>Resource-efficiency</b> | ID1: Well, I think that if you could, together with your clinician, select some items to fill out, that you can choose for the most important ones, select them from a list. What kind of topics are there to select from? Sleep, activities, mood, and that you choose for yourself, which items you find important and you want to measure. | ID24: It would be helpful if we would have a list to select from, a bit like a menu. That would really lower the threshold to use it, you only have to click. [...] And that you have a sort of construction where you are led through a menu of questions. It should look attractive.                                                                                                                                                      |
|                            | ID14: Because, well, I'm constantly thinking about that psychiatrist that has to work through so many things before you arrive for the session. I just don't see that happening. So, it should be really easy to use and straightforward, so that you can easily see, hey this jumps out, this is something to talk about in the session.     | ID32: It should really be ready to use. I shouldn't have to do a lot with it, this sounds really lazy. But all information should be in there, all items should be in there, there should be a fully functional app, and I should be instructed in how it works.                                                                                                                                                                            |

|                                           |                                                                                                                                                                                                                                                                                                                                                                                                                                 |                                                                                                                                                                                                                                                                                                                                                                                                                                                        |
|-------------------------------------------|---------------------------------------------------------------------------------------------------------------------------------------------------------------------------------------------------------------------------------------------------------------------------------------------------------------------------------------------------------------------------------------------------------------------------------|--------------------------------------------------------------------------------------------------------------------------------------------------------------------------------------------------------------------------------------------------------------------------------------------------------------------------------------------------------------------------------------------------------------------------------------------------------|
| <b>According to best practices on EMA</b> | ID2: There is also a danger in there, because, for example, it has been shown that exercise, especially outside, is really important for depressed people. And if I don't find that important at all, then I won't add that [to the assessment], whereas it is proven, over time, that if I have walked in the morning, I feel less depressed in the afternoon. And those are really important things that shouldn't be missed. | ID25: Yes but it really is very strongly a case of garbage in, garbage out, so if you put rubbish in...<br>ID24: You get rubbish out.<br>ID25: You get rubbish out, and then you either see nothing, or you see things that are not right. So you have to carefully define what you are putting in before you put someone to work with it. And potentially it might not have any effect or even adverse effects. But I don't think anybody knows that. |
| <b>Privacy</b>                            | ID13: Maybe you should also give permission [to share your data with the clinician]. Because otherwise you will have problem with data security.                                                                                                                                                                                                                                                                                | ID42: There is also a privacy issue, right? Because you carry the phone on you all the time. The more you think about user-friendliness, the more you should consider privacy.                                                                                                                                                                                                                                                                         |



### S3. Overview of goals, subgoals, the matching diary schedule, and diary constructs

| Goal                                        | Subgoal                                                             | Possible EMA schedules (preferred)          | Number of assessments per day (preferred) | Preselected diary constructs                                                                                                     |
|---------------------------------------------|---------------------------------------------------------------------|---------------------------------------------|-------------------------------------------|----------------------------------------------------------------------------------------------------------------------------------|
| <b>Discover when I experience symptoms</b>  | How do my symptoms vary over time?                                  | <u>Semi-random</u> or fixed                 | 3, <u>5</u> , 7, 10                       |                                                                                                                                  |
|                                             | At what moments of the day or week do I experience symptoms?        | <u>Semi-random</u> or fixed                 | 3, <u>5</u> , 7, 10                       |                                                                                                                                  |
|                                             | During what kind of activities do I experience symptoms?            | Semi-random                                 | 5, <u>7</u> , 10                          | <ul style="list-style-type: none"> <li>- Activities</li> <li>- Social company</li> <li>- Surroundings</li> </ul>                 |
|                                             | What kind of events influence my symptoms?                          | <u>Semi-random</u> or fixed                 | 3, <u>5</u> , 7, 10                       | <ul style="list-style-type: none"> <li>- Events</li> </ul>                                                                       |
| <b>Discover what influences my symptoms</b> | How do sleep and lifestyle influence my symptoms?                   | <u>Semi-random</u> or fixed                 | 3, 5, <u>7</u> , 10                       | <ul style="list-style-type: none"> <li>- Sleep</li> <li>- Food intake</li> <li>- Activities</li> </ul>                           |
|                                             | What triggers my symptoms?                                          | <u>Semi-random</u> or fixed                 | 3, 5, <u>7</u> , 10                       | <ul style="list-style-type: none"> <li>- Activities</li> <li>- Events</li> </ul>                                                 |
|                                             | What helps me cope with my symptoms?                                | <u>Semi-random</u> or fixed                 | 3, 5, <u>7</u> , 10                       | <ul style="list-style-type: none"> <li>- Activities</li> <li>- Social company</li> <li>- Resilience</li> <li>- Events</li> </ul> |
|                                             | How do my thoughts influence my symptoms?                           | <u>Semi-random</u> or fixed                 | 3, 5, <u>7</u> , 10                       | <ul style="list-style-type: none"> <li>- Worrying</li> <li>- Self-esteem</li> <li>- Events</li> </ul>                            |
|                                             | How do my physical and psychological symptoms influence each other? | <u>Semi-random</u> or fixed                 | 3, 5, <u>7</u> , 10                       | <ul style="list-style-type: none"> <li>- Bodily complaints</li> </ul>                                                            |
| <b>Monitoring changes in symptoms</b>       | What is the long-term course of my symptoms?                        | <u>Fixed, once-per-day</u> , or semi-random | 1, <u>3</u> , 5, 7, 10                    |                                                                                                                                  |
|                                             | How do my symptoms change over the course of treatment?             | <u>Fixed, once-per-day</u> , or semi-random | 1, <u>3</u> , 5, 7, 10                    |                                                                                                                                  |

What are the short-term effects of medication?

Semi-random

5, 7, 10

- Medication and side effects

---

**Note: The decision aid brief explains why each schedule is preferred:**

- **Brief motivation when semi-random schedule is preferred**

You selected a goal for which it is important to gain a complete picture of what you feel and experience. This can vary strongly from moment to moment. That is why we prefer to assess this at different times during the day. Precisely because you cannot predict the exact timing of the assessments, you gain the best insights into your experiences. Some people do not like this unpredictability. If that is the case for you, you can opt for assessments at fixed time points. But keep in mind that the diaries will offer a less reliable picture of your experiences.

- **Brief motivation when fixed schedule is preferred**

You selected a goal for which it is important to monitor how you feel for a longer period. For example, several weeks or months during your treatment. Most people prefer to complete the diaries at fixed moments during the day.

#### S4. Further specifications of the diary schedules

##### Overview of the EMA diary schedules and their specifications

| Schedule                                 | Number of assessments per day                                   | Minimal duration of the diary period | Time span each day | Duration of each assessment block | Minimal time in between assessments | Maximum time to complete assessments |
|------------------------------------------|-----------------------------------------------------------------|--------------------------------------|--------------------|-----------------------------------|-------------------------------------|--------------------------------------|
| <b>Semi-random</b>                       | 10                                                              | 7 days                               | 15h                | 90 minutes                        | 30 minutes                          | 30 minutes                           |
|                                          | 7                                                               | 14 days                              | 15h                | 15h/7 blocks<br>= 128.57 minutes  | 30 minutes                          | 30 minutes                           |
|                                          | 5                                                               | 14 days                              | 15h                | 10h/5 blocks<br>= 120 minutes     | 30 minutes                          | 30 minutes                           |
|                                          | 3 assessments is <b>not</b> possible for a semi-random schedule |                                      |                    |                                   |                                     |                                      |
| <b>Fixed</b>                             | 10                                                              | 7 days                               | 15h                | -                                 | Every 90 minutes                    | 30 minutes                           |
|                                          | 7                                                               | 14 days                              | 14h                | -                                 | Every 2 hours                       | 30 minutes                           |
|                                          | 5                                                               | 14 days                              | 12h                | -                                 | Every 3 hours                       | 30 minutes                           |
|                                          | 3                                                               | 30 days                              | 12h                | -                                 | Every 6 hours                       | 30 minutes                           |
| <b>Once-per-day (evening or morning)</b> | 1                                                               | 30 days                              | 24h                | -                                 | Every 24 hours                      | 180 minutes                          |

##### Note. Brief explainer

A semi-random EMA schedule consists of several assessment blocks, within which a beep (i.e. a text message with the request to fill in the EMA assessment) will occur at a semi-random moment. A semi-random schedule is helpful when the assessments need to occur at varying time-points from day to day, but also need to be relatively evenly spread out throughout the day. For example, a semi-random schedule with 10 assessments per day will have 10 assessments blocks spread-out over 15 hours, resulting in 10 assessment blocks of 90 minutes each. Within each block, an assessment will occur at a random moment, that is within the block 09.00h-10.30h, at 10.05h. The moment that each assessment occurs thus varies per assessment block and per day. To make sure that assessments do not occur too closely together, we specified a minimal time in between assessments of 30 minutes. This means that assessments occur at least 30 minutes apart, and at most 180 minutes (in case the first assessment occurs in the beginning of the first block, and the second assessment occurs in the end of the second block).

A fixed EMA schedule may be preferred when burden for clients need to minimized. In this schedule, beeps will occur at prespecified times that are consistent across days. For

example, for a fixed schedule with 10 beeps, beeps will occur exactly 90 minutes apart, that is each day at 9:00, then at 10:30, etc.

## S5. Matching symptom profiles with diary constructs

Overview of symptom profiles and related diary constructs and items.

| <b>Symptom profile</b> | <b>Preselected diary constructs semi-random or fixed schedules</b> | <b>Preselected diary constructs once-per-day schedules</b> | <b>Main item in feedback module</b>                                                              |
|------------------------|--------------------------------------------------------------------|------------------------------------------------------------|--------------------------------------------------------------------------------------------------|
| <b>Anxiety</b>         | Generalized anxiety                                                | Anxiety                                                    | At this moment, I feel anxious                                                                   |
| <b>Depression</b>      | Reduced interest and initiative<br>Worrying<br>Self-esteem         | Reduced interest and initiative<br>Worrying<br>Self-esteem | At this moment, I feel down                                                                      |
| <b>(Hypo)mania</b>     | (Hypo)mania<br>Sleep<br>Agitation                                  | (Hypo)mania<br>Sleep<br>Agitation                          | At this moment, I feel agitated                                                                  |
| <b>Psychosis</b>       | Hearing voices<br>Delusions<br>Social company                      | Psychosis                                                  | Since the previous assessment, I was bothered by the voices<br>At this moment, I feel suspicious |
| <b>Stress</b>          | Distress and agitation<br>Overstimulation<br>Stress                | Distress and agitation<br>Overstimulation<br>Stress        | At this moment, I feel stressed                                                                  |
| <b>Something else</b>  | -                                                                  | -                                                          | -                                                                                                |

**Note:** when 'something else' is selected as symptom profile, no diary constructs and diary items are preselected by PETRA.

## S6. Burden indicator

The PETRA decision aid contains a ‘burden bar’, which dynamically visualizes the number of items that are selected for a personalized EMA diary. This provides an index of the expected burden for the client, and by extension the clinician, who has to interpret multiple items in the PETRA feedbackmodule. PETRA’s decision aid offers extensive possibilities for personalization; each schedule offers 18-128 items. We therefore want to aid clients and clinicians in finding a balance between gaining additional information and reducing the burden. The burden indicator is thus primarily intended to remind clients and clinician to remain conscious of participant burden and to actively discuss this when compiling the EMA diary.

Currently, research on the effect of the number of items on compliance and experienced burden offers no clear-cut guidelines [3]. Therefore, the PETRA burden indicator is based on our experience with designing EMA studies and will be updated based on user experiences and emerging research. It is likely that the number of items and associated burden differs between and even within individuals, across populations, treatment stages, EMA schedules, and in clinical versus research settings. A recent meta-analysis reported that the number of items did not significantly impact compliance and retention [4]. An empirical study in students reported that 60 EMA items per diary was perceived as more burdensome than 30 EMA items [5]. A qualitative study that compiled researcher experiences with designing EMA studies reported that on average, EMA diaries consist of 30 items [6]. Finally, an overview paper recommended a maximum duration of 2-3 minutes spent per diary [7]. In line with these studies, it is our experience with EMA studies that an average of 25 EMA items is usually perceived as doable by most clients. The additional categories were based on this number.

**Example of the burden indicator [translation: 26 items selected (quite long)].**

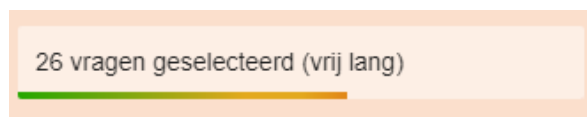

### Burden indicator for semi-random and fixed schedules

| Number of diary items | Color                     | Label      |
|-----------------------|---------------------------|------------|
| 10 or fewer           | Green                     | Low        |
| 11-25                 | Green                     | Average    |
| 26-35                 | Orange                    | Quite long |
| 36-44                 | Red                       | Too long   |
| 45 or more            | Indicator is red and full | Too long   |

### Burden indicator for once-per-day schedules

| Number of diary items | Color | Label   |
|-----------------------|-------|---------|
| 15 or fewer           | Green | Low     |
| 16-30                 | Green | Average |

|            |                           |            |
|------------|---------------------------|------------|
| 31-45      | Orange                    | Quite long |
| 45-60      | Red                       | Too long   |
| 60 or more | Indicator is red and full | Too long   |

---

## S7. Features of the decision aid and feedback module

The focus groups and interviews, as well as the usability sessions, indicated several needs of clients and clinicians that were then translated into specific PETRA features. It is beyond the scope of this paper to list them all, but for clarity we have listed some examples here.

Overview of needs of clients and clinicians and the resulting feature.

| <b>Need</b>                                                                                                                                                                                       | <b>Designed feature</b>                                                                                                                                                        |
|---------------------------------------------------------------------------------------------------------------------------------------------------------------------------------------------------|--------------------------------------------------------------------------------------------------------------------------------------------------------------------------------|
| Clients and clinicians want to know exactly how many steps it takes to construct a diary, and what their progress is                                                                              | Menu: displays the three steps of constructing the diary, as well as the choices already made                                                                                  |
| Clients and clinicians want to gain a quick overview of the items currently selected in the diary                                                                                                 | Preview function: displays the diary exactly as the client views it on the phone                                                                                               |
| Clients and clinicians want to be able to formulate highly person-specific items themselves                                                                                                       | Option to type in your own question. Instructions are provided on how to formulate a valid EMA-item                                                                            |
| Clients and clinicians are insecure about how many items per diary is doable                                                                                                                      | Burden indicator: visualizes the number of items and associated burden                                                                                                         |
| Clinicians want to be able to quickly repeat diaries, which saves time, especially if only a few adaptations are made (e.g., clients want to drop or add certain items or adjust diary frequency) | Repeat function: sets the diary specifications (e.g., selected items, assessment frequency, duration) exactly as a previous diary, which clients and clinicians can then adapt |
| Clinicians want to save the main conclusions on the diary results in a report, to be able to review the progress in future sessions                                                               | Report function: saves current specification of the graph, as well as typed in notes by client or clinician, to the electronic health record                                   |

## S8. Design of the feedback module

During the focus groups and user sessions, clients and clinicians highlighted several important goals for EMA feedback. These goals were grouped in three main themes, and resulted in different feedback types that were integrated in the feedback module of PETRA.

As outlined in the table below, clients and clinicians mostly agreed on relevant feedback types. An interesting challenge that arose was not necessarily the difference between clients and clinicians, but within-group variability. For example, clinicians with little EMA experience expressed the need for more straightforward and standardized feedback, whereas those with more EMA experience preferred more extensive customization of the EMA diaries and EMA feedback. A similar discrepancy emerged from the sessions with clients as well. Together with the user experience designer, we therefore decided it to be helpful if the feedback module first provides an overview picture of a given topic (e.g., mood, activities). Clients and clinicians can then zoom into moments of interest to get more details. This also makes sure that clients and clinicians are not overwhelmed with all information at once, but rather have the option to go into more detail if desired. Therefore, all the graphs are interactive and customizable.

| <b>Main theme</b>                                                        | <b>Goal</b>                                                                                                                                              | <b>Desired by</b>      | <b>Feedback type</b>                                                                                                               |
|--------------------------------------------------------------------------|----------------------------------------------------------------------------------------------------------------------------------------------------------|------------------------|------------------------------------------------------------------------------------------------------------------------------------|
| <b>Fluctuations and changes in symptoms and strengths over time</b>      | Gaining insight into the client's wellbeing                                                                                                              | Clients and clinicians | Line graph depicting fluctuations in symptoms/strengths                                                                            |
|                                                                          | Gaining insight into the fluctuations of mood and symptoms                                                                                               | Clients and clinicians | Line graph depicting fluctuations in symptoms/strengths                                                                            |
|                                                                          | What are strengths?<br>What is going well?                                                                                                               | Clients                | Bar graph depicting average mood, symptoms, and strengths during different (social) contexts)                                      |
|                                                                          | Providing a reminder on how the client felt in the previous week, what kind of events they experienced, and what kind of activities they participated in | Clients                | Summary blocks demonstrating on which day the client felt best, how often the client was active/passive/social, and sleep duration |
| <b>Associations between (social) contexts and symptoms and strengths</b> | Gaining insight into lifestyle: sleep quality and duration, physical activity, healthy eating, daily structure/rhythm                                    | Clients and clinicians | Summary blocks demonstrating on which day the client felt best, how often the client was active/passive/social, and sleep duration |



|                                          |                                                                                                                                                                     |                        |                                                                                                                                                                                                                                          |
|------------------------------------------|---------------------------------------------------------------------------------------------------------------------------------------------------------------------|------------------------|------------------------------------------------------------------------------------------------------------------------------------------------------------------------------------------------------------------------------------------|
|                                          | Gaining insight into effects and changes, for example due to behavior (smoking, exercising), taking medication, social interactions, (un)healthy eating, addictions | Clients and clinicians | Line graph depicting fluctuations in symptoms/strengths, with a context bar that offers contextual information for specific moments<br><br>Bar graph depicting average mood, symptoms, and strengths during different (social) contexts) |
| <b>The impact of (un)pleasant events</b> | Gaining insight into person-specific triggers: thoughts, events, coping strategies, and the perceived impact of the trigger                                         | Clients                | Line graph depicting fluctuations in symptoms/strengths, with a context bar that offers contextual information for specific moments<br><br>Word cloud that summarizes the text and provides context to thoughts and triggers             |

## S9. EMA diary items

### **Brief explanation**

The following pages will contain all EMA diary items incorporated in PETRA. Like explained in the main manuscript, there are four possible EMA schedules in PETRA:

1. **Semi-random schedule** (5, 7 or 10 assessments per day). In this schedule, participants are prompted in semi-random time-blocks spread out over the day.
2. **Fixed schedule** (3, 5, 7 or 10 assessments per day). In this schedule, participants are prompted at fixed moments throughout the day.
3. **Once-per-day evening schedule**. In this schedule, participants are prompted only once each day, in the evening.
4. **Once-per-day morning schedule**. In this schedule, participants are prompted only once each day, in the morning.

Each EMA schedule has its own item list.

In the **semi-random and fixed schedules**, the following constructs are addressed:

1. Mood
2. (Hypo)mania
3. Agitation and stress
4. Anxiety
5. Psychosis
6. Bodily complaints
7. Reduced interest and initiative
8. Surroundings, behavior, agents
9. Social interactions
10. Worrying
11. Self-esteem
12. Positivity
13. Formulate your own questions

In the **once-per-day schedules**, the following constructs are addressed:

1. Mood of the day
2. Mood of the morning
3. (Hypo)mania
4. Agitation and stress
5. Anxiety
6. Psychosis
7. Bodily complaints
8. Reduced interest and initiative
9. Events
10. Worrying
11. Self-esteem
12. Functioning and resilience
13. Sleep during the day
14. Sleep at night
15. Formulate your own questions

Note that some constructs contain multiple subconstructs.

### **Translation**

All EMA items are originally in Dutch, but were translated to English for the purposes of this paper.

### **Response scale**

Most items were answered on a 0-100 visual analogue scale (VAS). Other response options are outlined.

### **Item ordering**

The EMA diary items are ordered differently in the decision aid versus in the actual diary that the participants complete on their smartphones. In the decision aid, all items are grouped in constructs (as presented in the EMA item sets below). Some items (e.g., “I feel stressed”) are relevant to multiple constructs and are therefore offered multiple times in the decision aid.

After all diary items are compiled in the decision aid, PETRA will remove duplicate items and reorder the items to form the diary for the participant. In this diary, all EMA items are ordered as follows:

1. In-the-moment mood items (e.g., “Right now, I feel cheerful”)
2. In-the-moment other items (e.g., “Right now, my thoughts are racing”)
3. In-the-moment contextual items (e.g., “Right now, what am I doing?”)
4. Retrospective items (e.g., “Since the previous measurement, I have had fun”)
5. Personally formulated items
6. Qualitative item (“If you would like to note down something else about the period since the previous measurement, you can do that here.”)

### **Overlap in schedules**

The semi-random and fixed EMA schedules are very similar. In the fixed schedule, a few EMA items were excluded or adapted from ‘in-the-moment’ to retrospective items, to be able to capture the momentary experience.

The once-per-day schedules often are an insightful addition to the semi-random and fixed EMA schedules. Therefore, the PETRA decision aid has integrated some of the items of the once-per-day-schedules in the relevant (sub)constructs of the more frequent EMA schedules. These items are marked by \* in the once-per-day schedules.

### **Match with (sub)goals or symptom profiles**

Green highlighted items are automatically selected if it is matched to a (sub)goal or symptom profile. For example, selecting the profile “Anxiety” automatically selects the subconstruct “Anxiety”, which selects three out of five EMA items of this subconstruct. These highlighted items were chosen because they were considered relevant for a large group of patients.

### **References**

For each item, we have included a (non-exhaustive) reference list of published EMA studies that have used these EMA items in diverse populations. In the fixed and semi-random schedules, 74% of the items originated from previous EMA research, and 26% were newly developed based on suggestions by clients and clinicians. For the once-per-day evening schedule, 92% items stemmed from previous EMA research, and 8% were newly developed.

Semi-random beep schedule 5, 7, or 10 times per day

Constructs, subconstructs, and EMA items

| <b>Main construct: Mood</b>                        |                                                                                                           |                                                                                                                      |                                         |                                         |                                                                                  |                  |
|----------------------------------------------------|-----------------------------------------------------------------------------------------------------------|----------------------------------------------------------------------------------------------------------------------|-----------------------------------------|-----------------------------------------|----------------------------------------------------------------------------------|------------------|
| <b>Subconstruct</b>                                | <b>EMA item (NL)</b>                                                                                      | <b>EMA item (EN)</b>                                                                                                 | <b>Response scale (NL)</b>              | <b>Response scale (EN)</b>              | <b>Construct</b>                                                                 | <b>Reference</b> |
| <b>Mood (obligatory)</b>                           | Op dit moment voel ik me opgewekt                                                                         | Right now, I feel cheerful                                                                                           | Helemaal niet - heel erg                | Not at all - very much                  | PA high arousal                                                                  | [2, 8-12]        |
|                                                    | Op dit moment voel ik me somber                                                                           | Right now, I feel down                                                                                               | Helemaal niet - heel erg                | Not at all - very much                  | NA low arousal                                                                   | [8-13]           |
|                                                    | Op dit moment voel ik me tevreden                                                                         | Right now, I feel content                                                                                            | Helemaal niet - heel erg                | Not at all - very much                  | PA low arousal                                                                   | [2, 8-12]        |
|                                                    | Op dit moment voel ik me geïrriteerd                                                                      | Right now, I feel irritated                                                                                          | Helemaal niet - heel erg                | Not at all - very much                  | NA high arousal                                                                  | [2, 10-13]       |
|                                                    | Op dit moment voel ik me energiek                                                                         | Right now, I feel energetic                                                                                          | Helemaal niet - heel erg                | Not at all - very much                  | PA high arousal                                                                  | [8-12]           |
|                                                    | Op dit moment voel ik me onrustig                                                                         | Right now, I feel restless                                                                                           | Helemaal niet - heel erg                | Not at all - very much                  | NA high arousal                                                                  | [8-11]           |
| <b>Standard last item of the EMA questionnaire</b> | Als u nog iets anders over de periode sinds het vorige meetmoment wilt noteren, dan kunt u dat hier doen. | If you would like to note down something else about the period since the previous measurement, you can do that here. | [String (optioneel), max 280 karakters] | [String (optional), max 280 characters] | Qualitative description of anything of relevance not captured by the other items |                  |
| <b>Main construct: (Hypo)mania</b>                 |                                                                                                           |                                                                                                                      |                                         |                                         |                                                                                  |                  |
| <b>Subconstruct</b>                                | <b>EMA item (NL)</b>                                                                                      | <b>EMA item (EN)</b>                                                                                                 | <b>Response scale (NL)</b>              | <b>Response scale (EN)</b>              | <b>Construct</b>                                                                 | <b>Reference</b> |
| <b>(Hypo)mania</b>                                 | Op dit moment voel ik me bijzonder goed                                                                   | Right now, I feel extremely well                                                                                     | Helemaal niet - heel erg                | Not at all - very much                  | Expansive mood                                                                   | [2]              |
|                                                    | Op dit moment voel ik me gejaagd                                                                          | Right now, I feel agitated                                                                                           | Helemaal niet - heel erg                | Not at all - very much                  | Agitation                                                                        | [2, 14]          |
|                                                    | Op dit moment voel ik me prikkelbaar                                                                      | Right now, I feel irritable                                                                                          | Helemaal niet - heel erg                | Not at all - very much                  | Irritable mood                                                                   | [9]              |

|                                             | Op dit moment gaan mijn gedachten snel                         | Right now, my thoughts are racing                                 | Helemaal niet - heel erg   | Not at all - very much     | Racing thoughts         | [2, 14]          |
|---------------------------------------------|----------------------------------------------------------------|-------------------------------------------------------------------|----------------------------|----------------------------|-------------------------|------------------|
|                                             | Op dit moment ben ik snel afgeleid                             | Right now, I am easily distracted                                 | Helemaal niet - heel erg   | Not at all - very much     | Distractability         | [2, 9]           |
|                                             | Op dit moment zit ik vol goede ideeën                          | Right now, I am full of good ideas                                | Helemaal niet - heel erg   | Not at all - very much     | Expansive ideas         | [2, 15]          |
|                                             | Op dit moment heb ik zin om met anderen af te spreken          | Right now, I feel like socializing                                | Helemaal niet - heel erg   | Not at all - very much     | Need for social contact | [2]              |
|                                             | Op dit moment kan ik snel schakelen                            | Right now, I can focus and switch easily                          | Helemaal niet - heel erg   | Not at all - very much     | Thinking clearly        | [2, 14]          |
|                                             | Sinds het vorige meetmoment heb ik contact gezocht met anderen | Since the previous measurement, I have sought contact with others | Helemaal niet - heel erg   | Not at all - very much     | Actual social contact   | [2]              |
|                                             | Sinds het vorige meetmoment ben ik spraakzaam geweest          | Since the previous measurement, I have been talkative             | Helemaal niet - heel erg   | Not at all - very much     | Talkativeness           | [2, 14]          |
| <b>Main construct: Agitation and stress</b> |                                                                |                                                                   |                            |                            |                         |                  |
| <b>Subconstruct</b>                         | <b>EMA item (NL)</b>                                           | <b>EMA item (EN)</b>                                              | <b>Response scale (NL)</b> | <b>Response scale (EN)</b> | <b>Construct</b>        | <b>Reference</b> |
| <b>Agitation</b>                            | Op dit moment voel ik me gestrest                              | Right now, I feel stressed                                        | Helemaal niet - heel erg   | Not at all - very much     | Stressed feeling        | [10]             |
|                                             | Op dit moment voel ik me wantrouwig                            | Right now, I feel suspicious                                      | Helemaal niet - heel erg   | Not at all - very much     | Paranoid delusion       | [16, 17]         |
|                                             | Op dit moment voel ik me gespannen                             | Right now, I feel tense                                           | Helemaal niet - heel erg   | Not at all - very much     | Stressed feeling        | [10]             |
|                                             | Op dit moment voel ik me gejaagd                               | Right now, I feel agitated                                        | Helemaal niet - heel erg   | Not at all - very much     | Agitation               | [2, 14]          |
|                                             | Op dit moment voel ik me prikkelbaar                           | Right now, I feel irritable                                       | Helemaal niet - heel erg   | Not at all - very much     | Irritable mood          | [9]              |
| <b>Over-stimulation</b>                     | Op dit moment voel ik me overprikeld                           | Right now, I feel over-stimulated                                 | Helemaal niet - heel erg   | Not at all - very much     | Over-stimulation        | Adapted from[18] |

|               |                                                                                                                             |                                                                                                               |                                                  |                                         |                                  |              |
|---------------|-----------------------------------------------------------------------------------------------------------------------------|---------------------------------------------------------------------------------------------------------------|--------------------------------------------------|-----------------------------------------|----------------------------------|--------------|
|               | Op dit moment is het een chaos in mijn hoofd                                                                                | Right now, my mind is reeling                                                                                 | Helemaal niet - heel erg                         | Not at all - very much                  | Disorganized thinking            | [17]         |
|               | Op dit moment ben ik snel afgeleid                                                                                          | Right now, I am easily distracted                                                                             | Helemaal niet - heel erg                         | Not at all - very much                  | Concentration/distractability    | [9]          |
|               | Op dit moment kan ik me goed concentreren                                                                                   | Right now, I can concentrate well                                                                             | Helemaal niet - heel erg                         | Not at all - very much                  | Concentration                    | [10, 12, 17] |
| <b>Stress</b> |                                                                                                                             |                                                                                                               |                                                  |                                         |                                  |              |
|               | Op dit moment voel ik me gestrest                                                                                           | Right now, I feel stressed                                                                                    | Helemaal niet - heel erg                         | Not at all - very much                  | Stressed feeling                 | [19]         |
|               | Op dit moment zie ik op tegen de rest van de dag                                                                            | Right now, I am dreading the rest of the day                                                                  | Helemaal niet - heel erg                         | Not at all - very much                  |                                  | [10]         |
|               | Denk aan de meest plezierige gebeurtenis of activiteit sinds het vorige meetmoment. Hoe plezierig was deze gebeurtenis?     | Think of the most pleasant event or activity since the previous measurement. How pleasurable was this event?  | Helemaal niet - heel erg plezierig               | Not pleasant at all - very pleasant     | Reward sensitivity               | [11, 12, 19] |
|               | Hoe heftig was deze gebeurtenis?                                                                                            | How intense was this event?                                                                                   | Helemaal niet - heel erg                         | Not at all - very much                  | Reward sensitivity               | [11]         |
|               | De plezierige ervaring had te maken met:                                                                                    | The pleasant event concerned:                                                                                 | [String (optioneel), max 280 karakters]          | [String (optional), max 280 characters] | Qualitative description of event | [11]         |
|               | Denk aan de meest onplezierige gebeurtenis of activiteit sinds het vorige meetmoment. Hoe onplezierig was deze gebeurtenis? | Think of the most unpleasant event or activity since the previous measurement. How unpleasant was this event? | Helemaal niet onplezierig - heel erg onplezierig | Not unpleasant at all - very unpleasant | Stress reactivity                | [11, 12, 19] |
|               | Hoe heftig was deze gebeurtenis?                                                                                            | How intense was this event?                                                                                   | Helemaal niet - heel erg                         | Not at all - very much                  | Stress reactivity                | [11]         |

|                                             | De onplezierige ervaring had te maken met                    | The unpleasant event concerned:                                       | [String (optioneel), max 280 karakters] | [String (optional), max 280 characters] | Qualitative description of event | [11]             |
|---------------------------------------------|--------------------------------------------------------------|-----------------------------------------------------------------------|-----------------------------------------|-----------------------------------------|----------------------------------|------------------|
| <b>Main construct: Anxiety</b>              |                                                              |                                                                       |                                         |                                         |                                  |                  |
| <b>Subconstruct</b>                         | <b>EMA item (NL)</b>                                         | <b>EMA item (EN)</b>                                                  | <b>Response scale (NL)</b>              | <b>Response scale (EN)</b>              | <b>Construct</b>                 | <b>Reference</b> |
|                                             | Op dit moment voel ik me veilig                              | Right now, I feel safe                                                | Helemaal niet - heel erg                | Not at all - very much                  | Feeling safe                     | [20]             |
|                                             | Op dit moment voel ik me gespannen                           | Right now, I feel tense                                               | Helemaal niet - heel erg                | Not at all - very much                  | Stressed feeling                 | [19]             |
|                                             | Op dit moment ben ik aan het piekeren                        | Right now, I worry                                                    | Helemaal niet - heel erg                | Not at all - very much                  | Worrying                         | [10, 11]         |
|                                             | Sinds het vorige meetmoment heb ik iets afgezegd of vermeden | Since the previous measurement, I have cancelled or avoided something | Helemaal niet - heel erg                | Not at all - very much                  | Avoidance                        | [21]             |
|                                             | Op dit moment ben ik bang om alleen te zijn                  | Right now, I am scared of being alone                                 | Helemaal niet - heel erg                | Not at all - very much                  | Anxiety for being alone          | [21]             |
| <b>Intrusions and compulsive complaints</b> | Sinds het vorige meetmoment had ik nare herinneringen        | Since the previous measurement, I had intrusive memories              | Helemaal niet - heel erg                | Not at all - very much                  | Intrusions                       | [21]             |
|                                             | Sinds het vorige meetmoment heb ik dwangklachten gehad       | Since the previous measurement, I had compulsive complaints           | Helemaal niet - heel erg                | Not at all - very much                  | Compulsive complaints            | [21]             |
| <b>Panic</b>                                | Op dit moment ben ik bang dat ik een paniekaanval krijg      | Right now, I am scared of having a panic attack                       | Helemaal niet - heel erg                | Not at all - very much                  | Anxiety for panic attacks        | [21]             |
|                                             | Sinds het vorige meetmoment had ik last van panieklachten    | Since the previous measurement, I had panic complaints (f.e.,         | Helemaal niet - heel erg                | Not at all - very much                  | Physical anxiety complaints      | [21]             |

|                                  | (bijv. hartkloppingen, zweten, misselijkheid)                                     | heart palpitations, sweating, nausea)                                                              |                                                                                                                                                                                                                                                                                                                                                         |                                                                                                                                                                                                                                                                                                                                                         |                            |                   |
|----------------------------------|-----------------------------------------------------------------------------------|----------------------------------------------------------------------------------------------------|---------------------------------------------------------------------------------------------------------------------------------------------------------------------------------------------------------------------------------------------------------------------------------------------------------------------------------------------------------|---------------------------------------------------------------------------------------------------------------------------------------------------------------------------------------------------------------------------------------------------------------------------------------------------------------------------------------------------------|----------------------------|-------------------|
| <b>Derealization</b>             | Op dit moment voel ik me onwerkelijk                                              | Right now, I feel surreal                                                                          | Helemaal niet - heel erg                                                                                                                                                                                                                                                                                                                                | Not at all - very much                                                                                                                                                                                                                                                                                                                                  | Derealization              | [21]              |
|                                  | Op dit moment ben ik bang om de controle te verliezen                             | Right now, I am scared of losing control                                                           | Helemaal niet - heel erg                                                                                                                                                                                                                                                                                                                                | Not at all - very much                                                                                                                                                                                                                                                                                                                                  | Anxiety for losing control | [21]              |
| <b>Main construct: Psychosis</b> |                                                                                   |                                                                                                    |                                                                                                                                                                                                                                                                                                                                                         |                                                                                                                                                                                                                                                                                                                                                         |                            |                   |
| <b>Subconstruct</b>              | <b>EMA item (NL)</b>                                                              | <b>EMA item (EN)</b>                                                                               | <b>Response scale (NL)</b>                                                                                                                                                                                                                                                                                                                              | <b>Response scale (EN)</b>                                                                                                                                                                                                                                                                                                                              | <b>Construct</b>           | <b>Reference</b>  |
| <b>Hearing voices</b>            | Sinds het vorige meetmoment hoorde ik stemmen                                     | Since the previous measurement, I heard voices                                                     | - Ja<br>- Nee                                                                                                                                                                                                                                                                                                                                           | - Yes<br>- No                                                                                                                                                                                                                                                                                                                                           | Hearing voices             | [20]              |
| (if yes on first item)           | Sinds het vorige meetmoment had ik last van de stemmen                            | Since the previous measurement, I was bothered by the voices                                       | Helemaal niet - heel erg                                                                                                                                                                                                                                                                                                                                | Not at all - very much                                                                                                                                                                                                                                                                                                                                  | Bothered by the voices     | Adapted from [22] |
| (if yes on first item)           | Wat was de voornaamste copingstrategie die je hebt gebruikt tegen de stemmenlast? | What was your main coping strategy that you used against the burden you experienced by the voices? | <b>Checklist: (één optie mogelijk)</b><br>- Doen wat de stemmen zeggen<br>- In gesprek gaan met de stemmen<br>- De stemmen wegsturen of zeggen te stoppen<br>- Afleiding door iets sociaals<br>- Afleiding door iets taligs (bijv. lezen, zingen)<br>- Afleiding door werkgeheugenbelasting (bijv. TemStem, woordpuzzel)<br>- Blowen of alcohol drinken | <b>Checklist (one option possible)</b><br>- Do what voices say<br>- Talk to voices<br>- Send voices away or order to stop<br>- Distract by doing something social<br>- Distract by something verbal (f.e., reading, singing)<br>- Distract by taxing the working memory (f.e., TemStem, word puzzle)<br>- Using drugs or alcohol<br>- Taking medication | Coping with the voices     | Adapted from [22] |



|                        |                                                                                     |                                                                                       |                                                                                                                                                                                                                                              |                                                                                                                                                                                                                     |                                  |                   |
|------------------------|-------------------------------------------------------------------------------------|---------------------------------------------------------------------------------------|----------------------------------------------------------------------------------------------------------------------------------------------------------------------------------------------------------------------------------------------|---------------------------------------------------------------------------------------------------------------------------------------------------------------------------------------------------------------------|----------------------------------|-------------------|
|                        |                                                                                     |                                                                                       | <ul style="list-style-type: none"> <li>- Medicatie innemen</li> <li>- Iets ontspannens (bijv. sporten, muziek luisteren)</li> <li>- Geruststellende gedachten</li> <li>- Ik gebruikte geen copingstrategie</li> <li>- Iets anders</li> </ul> | <ul style="list-style-type: none"> <li>- Something relaxing (f.e., doing sports, listening to music)</li> <li>- Reassuring thoughts</li> <li>- I did not use a coping strategy</li> <li>- Something else</li> </ul> |                                  |                   |
| (if yes on first item) | In welke mate heeft deze copingstrategie je geholpen de stemmenlast te verminderen? | To what extent has the coping strategy helped you to reduce the burden of the voices? | Helemaal niet - heel erg                                                                                                                                                                                                                     | Not at all - very much                                                                                                                                                                                              | Effectivity of coping strategies | Adapted from [22] |
| (if yes on first item) | De stemmen maakten mij boos                                                         | The voices made me angry                                                              | Helemaal niet - heel erg                                                                                                                                                                                                                     | Not at all - very much                                                                                                                                                                                              | Emotions due to the voices       | Adapted from [22] |
| (if yes on first item) | De stemmen maakten mij blij                                                         | The voices made me happy                                                              | Helemaal niet - heel erg                                                                                                                                                                                                                     | Not at all - very much                                                                                                                                                                                              | Emotions due to the voices       | Adapted from [22] |
| (if yes on first item) | De stemmen maakten mij bedroefd                                                     | The voices made me sad                                                                | Helemaal niet - heel erg                                                                                                                                                                                                                     | Not at all - very much                                                                                                                                                                                              | Emotions due to the voices       | Adapted from [22] |
| (if yes on first item) | De stemmen maakten mij beschaamd                                                    | The voices made me feel ashamed                                                       | Helemaal niet - heel erg                                                                                                                                                                                                                     | Not at all - very much                                                                                                                                                                                              | Emotions due to the voices       | Adapted from [22] |
| (if yes on first item) | De stemmen maakten mij bang                                                         | The voices scared me                                                                  | Helemaal niet - heel erg                                                                                                                                                                                                                     | Not at all - very much                                                                                                                                                                                              | Emotions due to the voices       | Adapted from [22] |
| <b>Delusions</b>       | Op dit moment voel ik me wantrouwig                                                 | Right now, I feel suspicious                                                          | Helemaal niet - heel erg                                                                                                                                                                                                                     | Not at all - very much                                                                                                                                                                                              | Paranoid delusion                | [13, 17, 20]      |
|                        | Op dit moment voel ik me veilig                                                     | Right now, I feel safe                                                                | Helemaal niet - heel erg                                                                                                                                                                                                                     | Not at all - very much                                                                                                                                                                                              | Paranoid delusion                | [20]              |
|                        | Op dit moment lijkt alles betekenis te hebben                                       | Right now, I feel as if                                                               | Helemaal niet - heel erg                                                                                                                                                                                                                     | Not at all - very much                                                                                                                                                                                              | Verhoogde betekenisgeving        | [13]              |
|                        | Op dit moment voel ik me onwerkelijk                                                | Right now, I feel surreal                                                             | Helemaal niet - heel erg                                                                                                                                                                                                                     | Not at all - very much                                                                                                                                                                                              | Derealization                    | [21]              |

|                                          | Het is weer bezig                                          | It is going on again                            | Helemaal niet - heel erg                                                                                                                                                                                                                                                                                                                                                                                                                              | Not at all - very much                                                                                                                                                                                                                                                                                                                                                                                 | Person-specific delusion | [23]              |
|------------------------------------------|------------------------------------------------------------|-------------------------------------------------|-------------------------------------------------------------------------------------------------------------------------------------------------------------------------------------------------------------------------------------------------------------------------------------------------------------------------------------------------------------------------------------------------------------------------------------------------------|--------------------------------------------------------------------------------------------------------------------------------------------------------------------------------------------------------------------------------------------------------------------------------------------------------------------------------------------------------------------------------------------------------|--------------------------|-------------------|
|                                          | Op dit moment worden mijn gedachten door anderen beïnvloed | Right now, my thoughts are influenced by others | Helemaal niet - heel erg                                                                                                                                                                                                                                                                                                                                                                                                                              | Not at all - very much                                                                                                                                                                                                                                                                                                                                                                                 | Beïnvloedingsw aan       | [13, 17, 20]      |
| <b>Main construct: Bodily complaints</b> |                                                            |                                                 |                                                                                                                                                                                                                                                                                                                                                                                                                                                       |                                                                                                                                                                                                                                                                                                                                                                                                        |                          |                   |
| <b>Subconstruct</b>                      | <b>EMA item (NL)</b>                                       | <b>EMA item (EN)</b>                            | <b>Response scale (NL)</b>                                                                                                                                                                                                                                                                                                                                                                                                                            | <b>Response scale (EN)</b>                                                                                                                                                                                                                                                                                                                                                                             | <b>Construct</b>         | <b>Reference</b>  |
| <b>Bodily complaints</b>                 | Op dit moment heb ik last van:                             | Right now, I am bothered by:                    | <b>Checklist (meerdere opties mogelijk):</b><br>- Ademhalingsproblemen (kortademigheid, moeilijk adem kunnen krijgen)<br>- Pijn of drukkend gevoel op de borst<br>- Hartkloppingen<br>- Misselijkheid of maag die van streek is<br>- Verstopping, dunne ontlasting of diarree<br>- Pijn in de buik of maagstreek<br>- Hoofdpijn<br>- Duizeligheid<br>- Vermoeidheid<br>- Rugpijn<br>- Pijn in spieren of gewrichten<br>- Verdoofd of tintelend gevoel | <b>Checklist (multiple responses possible):</b><br>- Trouble breathing (shortness of breath, breathing difficulties)<br>- Pain or pressing feeling on the chest<br>- Heart palpitations<br>- Nausea or upset stomach<br>- Constipation, diarrhea<br>- Abdominal pain or stomachaches<br>- Headache<br>- Dizziness<br>- Fatigue<br>- Back pain<br>- Pain in joints or muscles<br>- Numbness or tingling | Bodily complaints        | Adapted from [24] |
| (for each selected complaint)            | Hoeveel had je last van [klacht]                           | How much were you bothered by [complaint]       | Helemaal niet - heel erg                                                                                                                                                                                                                                                                                                                                                                                                                              | Not at all - very much                                                                                                                                                                                                                                                                                                                                                                                 | Bodily complaints        | [25]              |

|  |                                                                                           |                                                                                |                          |                        |                                            |      |
|--|-------------------------------------------------------------------------------------------|--------------------------------------------------------------------------------|--------------------------|------------------------|--------------------------------------------|------|
|  | Sinds het vorige meetmoment was ik in gedachten veel met mijn lichamelijke klachten bezig | Since the previous measurement, I was preoccupied by my bodily complaints      | Helemaal niet - heel erg | Not at all - very much | Preoccupation with bodily complaints       | [25] |
|  | Sinds het vorige meetmoment zocht ik afleiding van mijn lichamelijke klachten             | Since the previous measurement, I sought distraction from my bodily complaints | Helemaal niet - heel erg | Not at all - very much | Seeking distraction from bodily complaints | [25] |
|  | Sinds het vorige meetmoment voelde ik mij belemmerd door mijn lichamelijke klachten       | Since the previous measurement, I felt hindered by my bodily complaints        | Helemaal niet - heel erg | Not at all - very much | Feeling hindered by bodily complaints      | [25] |

| <b>Main construct: Reduced interest</b>               |                                                                                                            |                                                                                                        |                                       |                            |                      |                  |
|-------------------------------------------------------|------------------------------------------------------------------------------------------------------------|--------------------------------------------------------------------------------------------------------|---------------------------------------|----------------------------|----------------------|------------------|
| <b>Subconstruct</b>                                   | <b>EMA item (NL)</b>                                                                                       | <b>EMA item (EN)</b>                                                                                   | <b>Response scale (NL)</b>            | <b>Response scale (EN)</b> | <b>Construct</b>     | <b>Reference</b> |
| <b>Reduced interest and initiative</b>                | Ik heb zin in de rest van de dag                                                                           | I look forward to the rest of the day                                                                  | Helemaal niet - heel erg              | Not at all - very much     | Anticipatory reward  | [2]              |
|                                                       | Op dit moment heb ik zin om met anderen te zijn                                                            | Right now, I feel like being with others                                                               | Helemaal niet - heel erg              | Not at all - very much     | Need for socializing | [10]             |
|                                                       | Op dit moment voel ik me lusteloos                                                                         | Right now, I feel listless                                                                             | Helemaal niet - heel erg              | Not at all - very much     | Anhedonia            | [10, 12]         |
| <b>Main construct: Surroundings, behavior, agents</b> |                                                                                                            |                                                                                                        |                                       |                            |                      |                  |
| <b>Subconstruct</b>                                   | <b>EMA item (NL)</b>                                                                                       | <b>EMA item (EN)</b>                                                                                   | <b>Response scale (NL)</b>            | <b>Response scale (EN)</b> | <b>Construct</b>     | <b>Reference</b> |
| <b>Events</b>                                         | Denk aan de meest plezierige gebeurtenis of activiteit sinds het vorige meetmoment. Hoe plezierig was dit? | Think of the most pleasant event or activity since the previous measurement. How pleasurable was this? | Helemaal niet - heel erg<br>plezierig | Not at all - very pleasant | Reward sensitivity   | [11, 19]         |

|                 |                                                                                                                |                                                                                                         |                                                                                                                                                                                                                                                                                                         |                                                                                                                                                                                                                                                                                                                                     |                                  |          |
|-----------------|----------------------------------------------------------------------------------------------------------------|---------------------------------------------------------------------------------------------------------|---------------------------------------------------------------------------------------------------------------------------------------------------------------------------------------------------------------------------------------------------------------------------------------------------------|-------------------------------------------------------------------------------------------------------------------------------------------------------------------------------------------------------------------------------------------------------------------------------------------------------------------------------------|----------------------------------|----------|
|                 | Hoe heftig was deze gebeurtenis of activiteit?                                                                 | How intense was this event?                                                                             | Helemaal niet - heel erg                                                                                                                                                                                                                                                                                | Not at all - very much                                                                                                                                                                                                                                                                                                              | Reward sensitivity               | [11]     |
|                 | De plezierige ervaring had te maken met:                                                                       | The pleasant event concerned:                                                                           | [String (optioneel), max 280 karakters]                                                                                                                                                                                                                                                                 | [String (optional), max 280 characters]                                                                                                                                                                                                                                                                                             | Qualitative description of event | [11, 19] |
|                 | Denk aan de meest onplezierige gebeurtenis of activiteit sinds het vorige meetmoment. Hoe onplezierig was dit? | Think of the most unpleasant event or activity since the previous measurement. How unpleasant was this? | Helemaal niet - heel erg onplezierig                                                                                                                                                                                                                                                                    | Not at all – very unpleasant                                                                                                                                                                                                                                                                                                        | Stress reactivity                | [11]     |
|                 | Hoe heftig was dit?                                                                                            | How intense was this?                                                                                   | Helemaal niet - heel erg                                                                                                                                                                                                                                                                                | Not at all - very much                                                                                                                                                                                                                                                                                                              | Stress reactivity                | [11]     |
|                 | De onplezierige gebeurtenis had te maken met                                                                   | The unpleasant event concerned:                                                                         | [String (optioneel), max 280 karakters]                                                                                                                                                                                                                                                                 | [String (optional), max 280 characters]                                                                                                                                                                                                                                                                                             | Qualitative description of event | [11]     |
| <b>Activity</b> | Op dit moment, wat doe ik?                                                                                     | Right now, what am I doing?                                                                             | <b>Checklist (één optie mogelijk):</b><br>- Werken/studeren<br>- Sporten/wandelen/fietsen<br>- Hobby (bijv. muziek maken, klussen)<br>- Uitje (bijv. naar de stad, concert)<br>- Iets rustigs (bijv. lezen, tv kijken)<br>- Met iemand praten<br>- Iets intiems (bijv. knuffelen, seks)<br>- Whatsappen | <b>Checklist (one option possible):</b><br>- Working/studying<br>- Doing sports/walking/biking<br>- Hobby (f.e., making music, DIY)<br>- Outing (f.e., going into the city or a concert)<br>- Something relaxing (f.e., reading, watching TV)<br>- Talking to someone<br>- Something intimate (cuddling, sex)<br>- Whatsapp/texting | (social) context                 | [9-11]   |

|                     |                                                                        |                                                                     |                                                                                                                                                                                                                                                                                                  |                                                                                                                                                                                                                                                                                                                                           |                   |              |
|---------------------|------------------------------------------------------------------------|---------------------------------------------------------------------|--------------------------------------------------------------------------------------------------------------------------------------------------------------------------------------------------------------------------------------------------------------------------------------------------|-------------------------------------------------------------------------------------------------------------------------------------------------------------------------------------------------------------------------------------------------------------------------------------------------------------------------------------------|-------------------|--------------|
|                     |                                                                        |                                                                     | <ul style="list-style-type: none"> <li>- Social Media</li> <li>- Eten</li> <li>- Huishouden/<br/>boodschappen/<br/>administratie</li> <li>- Zelfverzorging (bijv.<br/>douchen, opmaken)</li> <li>- Rusten/niets</li> <li>- Ik ben onderweg</li> <li>- Iets anders</li> </ul>                     | <ul style="list-style-type: none"> <li>- Social Media</li> <li>- Eating</li> <li>- Household chores/<br/>grocery shopping/<br/>administration</li> <li>- Self-care (f.e., showering,<br/>applying make-up)</li> <li>- Resting/nothing</li> <li>- Travelling, or moving from<br/>one place to another</li> <li>- Something else</li> </ul> |                   |              |
|                     | Deze activiteit vind ik...                                             | I find this activity...                                             | Zeer onplezierig - zeer<br>plezierig                                                                                                                                                                                                                                                             | Very unpleasant – very<br>pleasant                                                                                                                                                                                                                                                                                                        |                   | [9-11]       |
|                     | Sinds het vorige<br>meetmoment ben ik<br>lichamelijk actief<br>geweest | Since the previous<br>measurement, I have<br>been physically active | Helemaal niet - heel erg                                                                                                                                                                                                                                                                         | Not at all - very much                                                                                                                                                                                                                                                                                                                    | Physical activity | [10, 11, 26] |
| <b>Surroundings</b> | Op dit moment ben ik<br>buiten                                         | Right now, I am outside                                             | <ul style="list-style-type: none"> <li>- Ja</li> <li>- Nee</li> </ul>                                                                                                                                                                                                                            | <ul style="list-style-type: none"> <li>- Yes</li> <li>- No</li> </ul>                                                                                                                                                                                                                                                                     | Being outside     | [21]         |
| (if outside)        | Hoeveel daglicht is er?                                                | How much daylight is<br>there?                                      | Helemaal niet – heel veel                                                                                                                                                                                                                                                                        | Not at all – a lot                                                                                                                                                                                                                                                                                                                        | Daylight          | [21]         |
|                     | Op dit moment, waar<br>ben ik?                                         | Right now, where am I?                                              | <b>Checklist (één optie<br/>mogelijk):</b> <ul style="list-style-type: none"> <li>- Thuis</li> <li>- School/werk</li> <li>- Bij familie/vrienden</li> <li>- Café, bibliotheek, park</li> <li>- Supermarkt/winkel</li> <li>- In de natuur</li> <li>- Hulpverlening</li> <li>- Onderweg</li> </ul> | <b>Checklist (one option<br/>possible):</b> <ul style="list-style-type: none"> <li>- Home</li> <li>- School/work</li> <li>- Family/friends</li> <li>- Cafe/library/park</li> <li>- Supermarket/shop</li> <li>- Nature</li> <li>- Health facility</li> </ul>                                                                               | Location          | [9]          |

|                                       |                                                                  |                                                                      |                                                                                                                                                                                                                                                             |                                                                                                                                                                                                                                      |                           |      |
|---------------------------------------|------------------------------------------------------------------|----------------------------------------------------------------------|-------------------------------------------------------------------------------------------------------------------------------------------------------------------------------------------------------------------------------------------------------------|--------------------------------------------------------------------------------------------------------------------------------------------------------------------------------------------------------------------------------------|---------------------------|------|
|                                       |                                                                  |                                                                      | - Ergens anders                                                                                                                                                                                                                                             | - Travelling, or moving from one place to another<br>- Somewhere else                                                                                                                                                                |                           |      |
| <b>Food, agents, and side-effects</b> | Sinds het vorige meetmoment heb ik de volgende middelen gebruikt | Since the previous measurement, I have taken the following           | <b>Checklist (meerdere opties mogelijk):</b><br>- Geen<br>- Sigaretten<br>- Koffie of energydrink<br>- Alcohol<br>- Snacks<br>- Snoep<br>- Cannabis<br>- Medicatie                                                                                          | <b>Checklist (multiple responses possible):</b><br>- None<br>- Cigarettes<br>- Coffee or energy drink<br>- Alcohol<br>- Snacks<br>- Candy<br>- Cannabis<br>- Medication                                                              | Middelen/medicatiegebruik | [17] |
|                                       | Sinds het vorige meetmoment heb ik deze ervaring(en) gehad       | Since the previous measurement, I have had the following experiences | <b>Checklist (meerdere opties mogelijk):</b><br>- Hoofdpijn<br>- Hongergevoel<br>- Misselijkheid<br>- Suf of slaperig<br>- Pijnlijke of stijve spieren<br>- Onrust van binnen<br>- Duizelig<br>- Droge mond<br>- Vlak<br>- Traag<br>- Geen van bovenstaande | <b>Checklist (multiple responses possible):</b><br>- Headache<br>- Hunger<br>- Nausea<br>- Drowsy or sleepy<br>- Painful or stiff muscles<br>- Restlessness<br>- Dizziness<br>- Dry mouth<br>- Flat<br>- Slow<br>- None of the above | Medication side-effects   | [21] |
| <b>Food</b>                           | Sinds het vorige meetmoment heb ik het volgende gegeten          | Since the previous measurement, I have eaten the following           | <b>Checklist (meerdere opties mogelijk):</b><br>- Broodmaaltijd<br>- Gezond tussendoortje<br>- Warme maaltijd                                                                                                                                               | <b>Checklist (multiple responses possible):</b><br>- Sandwich<br>- Healthy snack<br>- Hot meal                                                                                                                                       | Food type                 | [21] |

|                                        |                                                                                                |                                                                                       | - Snoep<br>- Snacks<br>- Niets                                                                                                                                                                           | - Candy<br>- Snack<br>- Nothing                                                                                                                                                                           |                      |                  |
|----------------------------------------|------------------------------------------------------------------------------------------------|---------------------------------------------------------------------------------------|----------------------------------------------------------------------------------------------------------------------------------------------------------------------------------------------------------|-----------------------------------------------------------------------------------------------------------------------------------------------------------------------------------------------------------|----------------------|------------------|
|                                        | Sinds het vorige meetmoment heb ik gegeten...                                                  | Since the previous measurement, I have eaten...                                       | Veel minder dan normaal - veel meer dan normaal                                                                                                                                                          | A lot less than usual – a lot more than usual                                                                                                                                                             | Food quantity        | [21]             |
|                                        | Sinds het vorige meetmoment heb ik gezond gegeten                                              | Since the previous measurement, I have eaten healthily                                | Helemaal niet - heel erg                                                                                                                                                                                 | Not at all - very much                                                                                                                                                                                    | Health level of food | [21]             |
| <b>Hoofdthema: Social interactions</b> |                                                                                                |                                                                                       |                                                                                                                                                                                                          |                                                                                                                                                                                                           |                      |                  |
| <b>Subconstruct</b>                    | <b>EMA item (NL)</b>                                                                           | <b>EMA item (EN)</b>                                                                  | <b>Response scale (NL)</b>                                                                                                                                                                               | <b>Response scale (EN)</b>                                                                                                                                                                                | <b>Construct</b>     | <b>Reference</b> |
| <b>Company</b>                         | Op dit moment ben ik...                                                                        | Right now, I am...                                                                    | <b>Checklist (één optie mogelijk):</b><br>- Alleen<br>- Alleen met huisdier<br>- In gezelschap                                                                                                           | <b>Checklist (one response possible):</b><br>- Alone<br>- Alone with pet<br>- In company                                                                                                                  | Alone/with others    | [11]             |
| (if in company)                        | Op dit moment, met wie ben ik?                                                                 | Right now, with whom am I?                                                            | <b>Checklist (meerdere opties mogelijk):</b><br>- Partner<br>- Huisgenoten<br>- Gezin<br>- Familie uitwonend<br>- Vrienden<br>- Collega's/ klasgenoten<br>- Hulpverleners<br>- Kennissen<br>- Onbekenden | <b>Checklist (multiple responses possible):</b><br>- Partner<br>- House mates<br>- Family<br>- Extended family<br>- Friends<br>- Colleagues/class mates<br>- Clinicians<br>- Acquaintances<br>- Strangers | Company type         | [9, 11, 13]      |
| (if in company)                        | Vul hier in met wie je bent. <i>NB: noteer hier geen namen en dergelijke. Denk om privacy.</i> | Indicate with whom you are. <i>Note: do not mention names here. Remember privacy.</i> | [String (optioneel), max 280 karakters]                                                                                                                                                                  | [String (optional), max 280 characters]                                                                                                                                                                   |                      | [27-29]          |

|                       |                                                                                                                                             |                                                                                                                                                                                  |                          |                        |                               |             |
|-----------------------|---------------------------------------------------------------------------------------------------------------------------------------------|----------------------------------------------------------------------------------------------------------------------------------------------------------------------------------|--------------------------|------------------------|-------------------------------|-------------|
| (if in company)       | Ik vind dit gezelschap aangenaam                                                                                                            | I find this company agreeable                                                                                                                                                    | Helemaal niet - heel erg | Not at all - very much | Social stress                 | [9, 11, 30] |
| (if in company)       | Ik heb het gevoel dat deze mensen me mogen                                                                                                  | I feel these people like me                                                                                                                                                      | Helemaal niet - heel erg | Not at all - very much | Social stress                 | [30]        |
| (if alone)            | Ik was liever in gezelschap geweest                                                                                                         | I'd rather have been in company                                                                                                                                                  | Helemaal niet - heel erg | Not at all - very much | Social stress                 | [13, 30]    |
| (if alone)            | Ik vind het fijn om nu alleen te zijn                                                                                                       | Right now, I like being alone                                                                                                                                                    | Helemaal niet - heel erg | Not at all - very much | Social stress                 | [30]        |
| (if in company)       | Ik voel me geaccepteerd in dit gezelschap                                                                                                   | I feel accepted by this company                                                                                                                                                  | Helemaal niet - heel erg | Not at all - very much | Social stress                 | [11, 30]    |
| (if in company)       | Ik voel me op mijn gemak in dit gezelschap                                                                                                  | I feel at ease in this company                                                                                                                                                   | Helemaal niet - heel erg | Not at all - very much | Social stress                 | [30]        |
| <b>Connected-ness</b> | Sinds het vorige meetmoment voelde ik me eenzaam                                                                                            | Since the previous measurement, I have felt lonely                                                                                                                               | Helemaal niet - heel erg | Not at all - very much | Loneliness                    | [9, 13]     |
|                       | Op dit moment voel ik dat ik om anderen geef                                                                                                | Right now, I feel I care for others                                                                                                                                              | Helemaal niet - heel erg | Not at all - very much | Caring for others             | [27-29]     |
|                       | Op dit moment voel ik dat anderen om mij geven                                                                                              | Right now, I feel that others care about me                                                                                                                                      | Helemaal niet - heel erg | Not at all - very much | Feeling others care about you | [17, 27-29] |
|                       | Op dit moment voel ik me verbonden met anderen                                                                                              | Right now, I feel connected with others                                                                                                                                          | Helemaal niet - heel erg | Not at all - very much | Feeling connected             | [27-29]     |
| <b>Interactions</b>   | Heb je sinds het vorige meetmoment gesprekken gehad?<br><i>Gesprekken duren langer dan 5 minuten. Dit kunnen face-to-face gesprekken of</i> | Since the previous measurement, did you have interactions?<br><i>Interactions last longer than 5 minutes, and can be face-to-face interactions or via online (social) media.</i> | - Ja<br>- Nee            | - Yes<br>- No          | Had interactions              | [27-29]     |



|                                                                                                                                                                                 |                                                                                                                                                                               |                                                                                                                                                                              |                                                                                                                                                                     |                                                   |         |  |
|---------------------------------------------------------------------------------------------------------------------------------------------------------------------------------|-------------------------------------------------------------------------------------------------------------------------------------------------------------------------------|------------------------------------------------------------------------------------------------------------------------------------------------------------------------------|---------------------------------------------------------------------------------------------------------------------------------------------------------------------|---------------------------------------------------|---------|--|
| <i>gesprekken via online (sociale) media zijn.</i>                                                                                                                              |                                                                                                                                                                               |                                                                                                                                                                              |                                                                                                                                                                     |                                                   |         |  |
| Sinds het vorige meetmoment, hoeveel gesprekken heb je gehad?                                                                                                                   | Since the previous measurement, how many interactions did you have?                                                                                                           | [Geef getal aan]                                                                                                                                                             | [indicate number]                                                                                                                                                   | Number of interactions                            | [27-29] |  |
| Denk aan het voor jou meest belangrijk gesprek sinds het vorige meetmoment. Met wie heb je dit gesprek gehad? <i>NB: noteer hier geen namen en dergelijke. Denk om privacy.</i> | Think about the most important interaction since the previous measurement. With whom did you have this interaction? <i>Note: do not mention names here. Remember privacy.</i> | [String (optioneel), max 280 karakters]                                                                                                                                      | [String (optional), max 280 characters]                                                                                                                             | Interaction partner                               | [27-29] |  |
| Wat voor gesprek was dit?                                                                                                                                                       | What kind of interaction was this?                                                                                                                                            | <b>Checklist (één optie mogelijk):</b><br>- Face-to-face<br>- Telefoongesprek<br>- Videobelgesprek<br>- Gesprek via email of sociale media (bijv. Whatsapp)<br>- Iets anders | <b>Checklist (one option possible):</b><br>- Face-to-face<br>- By phone<br>- By video messaging<br>- By e-mail or social media (f.e., whatsapp)<br>- Something else | Medium                                            | [27-29] |  |
| Hoe belangrijk was dit gesprek voor je?                                                                                                                                         | How important was this interaction for you?                                                                                                                                   | Helemaal niet - heel erg                                                                                                                                                     | Not at all - very much                                                                                                                                              | Interaction importance                            | [27-29] |  |
| Wat maakte dit gesprek belangrijk en waar ging het over?                                                                                                                        | What made this interaction important and what was it about?                                                                                                                   | [String (optioneel), max 280 karakters]                                                                                                                                      | [String (optional), max 280 characters]                                                                                                                             | Qualitative description of interaction importance | [27-29] |  |
| Hoe lang duurde het gesprek?                                                                                                                                                    | What was the duration of the interaction?                                                                                                                                     | [Geef getal aan (minuten)]                                                                                                                                                   | [Indicate number (minutes)]                                                                                                                                         | Interaction duration                              | [27-29] |  |

|                                 |                                                                                                                                    |                                                                                                                    |                                                                  |                                                         |                                         |                  |
|---------------------------------|------------------------------------------------------------------------------------------------------------------------------------|--------------------------------------------------------------------------------------------------------------------|------------------------------------------------------------------|---------------------------------------------------------|-----------------------------------------|------------------|
|                                 | Hoe (on)plezierig was de inhoud van het gesprek?                                                                                   | How (un)pleasant was the content of the interaction?                                                               | Heel erg onplezierig – heel erg plezierig                        | Very unpleasant – very pleasant                         | (Un)pleasantness of interaction content | [27-29]          |
|                                 | Hoe (on)plezierig heb je het gesprek zelf ervaren? <i>Denk hierbij bijvoorbeeld aan de houding en toon van je gesprekspartner.</i> | How (un)pleasant was the interaction itself? <i>Think about the attitude and tone of your interaction partner.</i> | Heel erg onplezierig – heel erg plezierig                        | Very unpleasant – very pleasant                         | (Un)pleasantness of interaction itself  | [27-29]          |
|                                 | In hoeverre beïnvloedde het gesprek je stemming?                                                                                   | To what extent did the interaction influence your mood?                                                            | Mijn stemming werd veel slechter - mijn stemming werd veel beter | My mood worsened a lot – my mood improved a lot         | Impact of interaction on mood           | [27-29]          |
|                                 | In hoeverre beïnvloedde het gesprek je energieniveau?                                                                              | To what extent did the interaction influence your energy level?                                                    | Het kostte me veel energie - Het leverde me veel energie op      | It cost me a lot of energy – it gave me a lot of energy | Impact of interaction on energy level   | [27-29]          |
|                                 | In hoeverre kon je jezelf zijn in dit gesprek?                                                                                     | To what extent could you be yourself in this interaction?                                                          | Helemaal niet - heel erg                                         | Not at all - very much                                  | Being yourself                          | [27-29]          |
|                                 | Ik voelde me gesteund door mijn gesprekspartner(s)                                                                                 | I felt supported by my interaction partner(s).                                                                     | Helemaal niet - heel erg                                         | Not at all - very much                                  | Feeling supported                       | [27-29]          |
|                                 | Is er sinds het vorige meetmoment nog een ander gesprek geweest dat je graag wilt beschrijven?                                     | Has there been another interaction since the previous measurement that you would like to describe?                 | - Ja<br>- Nee<br>[indien ja, herhaal vorige items]               | - Yes<br>- No<br>[if yes, repeat previous items]        | Another interaction                     | [27-29]          |
| <b>Main construct: Worrying</b> |                                                                                                                                    |                                                                                                                    |                                                                  |                                                         |                                         |                  |
| <b>Subconstruct</b>             | <b>EMA item (NL)</b>                                                                                                               | <b>EMA item (EN)</b>                                                                                               | <b>Response scale (NL)</b>                                       | <b>Response scale (EN)</b>                              | <b>Construct</b>                        | <b>Reference</b> |
| <b>Worrying</b>                 | Op dit moment ben ik aan het piekeren                                                                                              | Right now, I am worrying                                                                                           | Helemaal niet - heel erg                                         | Not at all - very much                                  | Worrying                                | [10, 11]         |

|                                                     |                                                     |                                                           |                                       |                               |                         |                  |
|-----------------------------------------------------|-----------------------------------------------------|-----------------------------------------------------------|---------------------------------------|-------------------------------|-------------------------|------------------|
|                                                     | Op dit moment laten mijn gedachten me niet los      | Right now, I can't disconnect from my thoughts            | Helemaal niet - heel erg              | Not at all - very much        | Worrying                | [17]             |
| <b>Main construct: Self-esteem</b>                  |                                                     |                                                           |                                       |                               |                         |                  |
| <b>Subconstruct</b>                                 | <b>EMA item (NL)</b>                                | <b>EMA item (EN)</b>                                      | <b>Response scale (NL)</b>            | <b>Response scale (EN)</b>    | <b>Construct</b>        | <b>Reference</b> |
| <b>Self-esteem</b>                                  | Op dit moment voel ik me goed over mezelf           | Right now, I feel good about myself                       | Helemaal niet - heel erg              | Not at all - very much        | Self-esteem             | [17]             |
|                                                     | Op dit moment zijn mijn gedachten over mezelf...    | Right now, my thoughts about myself are...                | Heel erg negatief – heel erg positief | Very negative – very positive | Self-esteem             | [10]             |
|                                                     | Op dit moment heb ik het gevoel te kort te schieten | Right now, I feel inadequate                              | Helemaal niet - heel erg              | Not at all - very much        | Self-esteem             | [9, 10]          |
|                                                     | Op dit moment voel ik me nuttig                     | Right now, I feel useful                                  | Helemaal niet - heel erg              | Not at all - very much        | Productivity            | [2]              |
| <b>Main construct: Positivity</b>                   |                                                     |                                                           |                                       |                               |                         |                  |
| <b>Subconstruct</b>                                 | <b>EMA item (NL)</b>                                | <b>EMA item (EN)</b>                                      | <b>Response scale (NL)</b>            | <b>Response scale (EN)</b>    | <b>Construct</b>        | <b>Reference</b> |
| <b>Positivity</b>                                   | Op dit moment voel ik me goed over mezelf           | Right now, I feel good about myself                       | Helemaal niet - heel erg              | Not at all - very much        | Self-esteem             | [21]             |
|                                                     | Op dit moment heb ik zin om met anderen te zijn     | Right now, I feel like socializing                        | Helemaal niet - heel erg              | Not at all - very much        | Need for social contact | [10]             |
|                                                     | Op dit moment voel ik me ontspannen                 | Right now, I feel relaxed                                 | Helemaal niet - heel erg              | Not at all - very much        | Feeling relaxed         | [9]              |
|                                                     | Op dit moment voel ik me gewaardeerd                | Right now, I feel appreciated                             | Helemaal niet - heel erg              | Not at all - very much        | Feeling appreciated     | [9]              |
|                                                     | Sinds het vorige meetmoment heb ik plezier gehad    | Since the previous measurement, I've experienced pleasure | Helemaal niet - heel erg              | Not at all - very much        | Experiencing pleasure   | [9]              |
|                                                     | Ik heb zin in de rest van de dag                    | I look forward to the rest of the day                     | Helemaal niet - heel erg              | Not at all - very much        | Anticipatory reward     | [2, 10]          |
| <b>Main construct: Formulate your own questions</b> |                                                     |                                                           |                                       |                               |                         |                  |
| <b>Subconstruct</b>                                 | <b>EMA item (NL)</b>                                | <b>EMA item (EN)</b>                                      | <b>Response scale (NL)</b>            | <b>Response scale (EN)</b>    | <b>Construct</b>        | <b>Reference</b> |

|                                     |                                                                                                      |                                                                                                       |                          |                        |                                |      |
|-------------------------------------|------------------------------------------------------------------------------------------------------|-------------------------------------------------------------------------------------------------------|--------------------------|------------------------|--------------------------------|------|
| <b>Formulate your own questions</b> | - Op dit moment [typ hier je eigen vraag]<br>- Sinds het vorige meetmoment [typ hier je eigen vraag] | - Right now [enter your question here]<br>- Since the previous measurement [enter your question here] | Helemaal niet - heel erg | Not at all - very much | Person-specific item           | [21] |
|                                     | - Op dit moment [typ hier je eigen vraag]<br>- Sinds het vorige meetmoment [typ hier je eigen vraag] | - Right now [enter your question here]<br>- Since the previous measurement [enter your question here] | Helemaal niet - heel erg | Not at all - very much | Person-specific item           | [21] |
|                                     | - Op dit moment [typ hier je eigen vraag]<br>- Sinds het vorige meetmoment [typ hier je eigen vraag] | - Right now [enter your question here]<br>- Since the previous measurement [enter your question here] | Helemaal niet - heel erg | Not at all - very much | Person-specific item           | [21] |
|                                     | - Op dit moment [typ hier je eigen vraag]<br>- Vandaag [typ hier je eigen vraag]                     | - Right now [enter your question here]<br>- Today [enter your question here]                          | Helemaal niet - heel erg | Not at all - very much | Person-specific item (evening) |      |

Fixed beep schedule 3, 5, 7, or 10 times per day

Constructs, subconstructs, and EMA items

| <b>Main construct: Mood</b>                        |                                                                                                           |                                                                                                                      |                                         |                                         |                                                                                  |                  |
|----------------------------------------------------|-----------------------------------------------------------------------------------------------------------|----------------------------------------------------------------------------------------------------------------------|-----------------------------------------|-----------------------------------------|----------------------------------------------------------------------------------|------------------|
| <b>Subconstruct</b>                                | <b>EMA item (NL)</b>                                                                                      | <b>EMA item (EN)</b>                                                                                                 | <b>Response scale (NL)</b>              | <b>Response scale (EN)</b>              | <b>Construct</b>                                                                 | <b>Reference</b> |
| <b>Mood (obligatory)</b>                           | Op dit moment voel ik me opgewekt                                                                         | Right now, I feel cheerful                                                                                           | Helemaal niet - heel erg                | Not at all - very much                  | PA high arousal                                                                  | [2, 8-12]        |
|                                                    | Op dit moment voel ik me somber                                                                           | Right now, I feel down                                                                                               | Helemaal niet - heel erg                | Not at all - very much                  | NA low arousal                                                                   | [8-13]           |
|                                                    | Op dit moment voel ik me tevreden                                                                         | Right now, I feel content                                                                                            | Helemaal niet - heel erg                | Not at all - very much                  | PA low arousal                                                                   | [2, 8-12]        |
|                                                    | Op dit moment voel ik me geïrriteerd                                                                      | Right now, I feel irritated                                                                                          | Helemaal niet - heel erg                | Not at all - very much                  | NA high arousal                                                                  | [2, 10-13]       |
|                                                    | Op dit moment voel ik me energiek                                                                         | Right now, I feel energetic                                                                                          | Helemaal niet - heel erg                | Not at all - very much                  | PA high arousal                                                                  | [8-12]           |
|                                                    | Op dit moment voel ik me onrustig                                                                         | Right now, I feel restless                                                                                           | Helemaal niet - heel erg                | Not at all - very much                  | NA high arousal                                                                  | [8-11]           |
| <b>Standard last item of the EMA questionnaire</b> | Als u nog iets anders over de periode sinds het vorige meetmoment wilt noteren, dan kunt u dat hier doen. | If you would like to note down something else about the period since the previous measurement, you can do that here. | [String (optioneel), max 280 karakters] | [String (optional), max 280 characters] | Qualitative description of anything of relevance not captured by the other items |                  |
| <b>Main construct: (Hypo)mania</b>                 |                                                                                                           |                                                                                                                      |                                         |                                         |                                                                                  |                  |
| <b>Subconstruct</b>                                | <b>EMA item (NL)</b>                                                                                      | <b>EMA item (EN)</b>                                                                                                 | <b>Response scale (NL)</b>              | <b>Response scale (EN)</b>              | <b>Construct</b>                                                                 | <b>Reference</b> |
| <b>(Hypo)mania</b>                                 | Op dit moment voel ik me bijzonder goed                                                                   | Right now, I feel extremely well                                                                                     | Helemaal niet - heel erg                | Not at all - very much                  | Expansive mood                                                                   | [2]              |
|                                                    | Op dit moment voel ik me gejaagd                                                                          | Right now, I feel agitated                                                                                           | Helemaal niet - heel erg                | Not at all - very much                  | Agitation                                                                        | [2, 14]          |
|                                                    | Op dit moment voel ik me prikkelbaar                                                                      | Right now, I feel irritable                                                                                          | Helemaal niet - heel erg                | Not at all - very much                  | Irritable mood                                                                   | [9]              |

|                                             | Op dit moment gaan mijn gedachten snel                         | Right now, my thoughts are racing                                 | Helemaal niet - heel erg   | Not at all - very much     | Racing thoughts         | [2, 14]          |
|---------------------------------------------|----------------------------------------------------------------|-------------------------------------------------------------------|----------------------------|----------------------------|-------------------------|------------------|
|                                             | Op dit moment ben ik snel afgeleid                             | Right now, I am easily distracted                                 | Helemaal niet - heel erg   | Not at all - very much     | Distractability         | [2, 9]           |
|                                             | Op dit moment zit ik vol goede ideeën                          | Right now, I am full of good ideas                                | Helemaal niet - heel erg   | Not at all - very much     | Expansive ideas         | [2, 15]          |
|                                             | Op dit moment heb ik zin om met anderen af te spreken          | Right now, I feel like socializing                                | Helemaal niet - heel erg   | Not at all - very much     | Need for social contact | [2]              |
|                                             | Op dit moment kan ik snel schakelen                            | Right now, I can focus and switch easily                          | Helemaal niet - heel erg   | Not at all - very much     | Thinking clearly        | [2, 14]          |
|                                             | Sinds het vorige meetmoment heb ik contact gezocht met anderen | Since the previous measurement, I have sought contact with others | Helemaal niet - heel erg   | Not at all - very much     | Actual social contact   | [2]              |
|                                             | Sinds het vorige meetmoment ben ik spraakzaam geweest          | Since the previous measurement, I have been talkative             | Helemaal niet - heel erg   | Not at all - very much     | Talkativeness           | [2, 14]          |
| <b>Main construct: Agitation and stress</b> |                                                                |                                                                   |                            |                            |                         |                  |
| <b>Subconstruct</b>                         | <b>EMA item (NL)</b>                                           | <b>EMA item (EN)</b>                                              | <b>Response scale (NL)</b> | <b>Response scale (EN)</b> | <b>Construct</b>        | <b>Reference</b> |
| <b>Agitation</b>                            | Op dit moment voel ik me gestrest                              | Right now, I feel stressed                                        | Helemaal niet - heel erg   | Not at all - very much     | Stressed feeling        | [10]             |
|                                             | Op dit moment voel ik me wantrouwig                            | Right now, I feel suspicious                                      | Helemaal niet - heel erg   | Not at all - very much     | Paranoid delusion       | [16, 17]         |
|                                             | Op dit moment voel ik me gespannen                             | Right now, I feel tense                                           | Helemaal niet - heel erg   | Not at all - very much     | Stressed feeling        | [10]             |
|                                             | Op dit moment voel ik me gejaagd                               | Right now, I feel agitated                                        | Helemaal niet - heel erg   | Not at all - very much     | Agitation               | [2, 14]          |
|                                             | Op dit moment voel ik me prikkelbaar                           | Right now, I feel irritable                                       | Helemaal niet - heel erg   | Not at all - very much     | Irritable mood          | [9]              |
| <b>Over-stimulation</b>                     | Op dit moment voel ik me overprikkeld                          | Right now, I feel over-stimulated                                 | Helemaal niet - heel erg   | Not at all - very much     | Over-stimulation        | Adapted from[18] |

|               |                                                                                                                             |                                                                                                               |                                                  |                                         |                                  |              |
|---------------|-----------------------------------------------------------------------------------------------------------------------------|---------------------------------------------------------------------------------------------------------------|--------------------------------------------------|-----------------------------------------|----------------------------------|--------------|
|               | Op dit moment is het een chaos in mijn hoofd                                                                                | Right now, my mind is reeling                                                                                 | Helemaal niet - heel erg                         | Not at all - very much                  | Disorganized thinking            | [17]         |
|               | Op dit moment ben ik snel afgeleid                                                                                          | Right now, I am easily distracted                                                                             | Helemaal niet - heel erg                         | Not at all - very much                  | Concentration/ distractability   | [9]          |
|               | Op dit moment kan ik me goed concentreren                                                                                   | Right now, I can concentrate well                                                                             | Helemaal niet - heel erg                         | Not at all - very much                  | Concentration                    | [10, 12, 17] |
| <b>Stress</b> |                                                                                                                             |                                                                                                               |                                                  |                                         |                                  |              |
|               | Op dit moment voel ik me gestrest                                                                                           | Right now, I feel stressed                                                                                    | Helemaal niet - heel erg                         | Not at all - very much                  | Stressed feeling                 | [19]         |
|               | Op dit moment zie ik op tegen de rest van de dag                                                                            | Right now, I am dreading the rest of the day                                                                  | Helemaal niet - heel erg                         | Not at all - very much                  |                                  | [10]         |
|               | Denk aan de meest plezierige gebeurtenis of activiteit sinds het vorige meetmoment. Hoe plezierig was deze gebeurtenis?     | Think of the most pleasant event or activity since the previous measurement. How pleasurable was this event?  | Helemaal niet - heel erg plezierig               | Not pleasant at all - very pleasant     | Reward sensitivity               | [11, 12, 19] |
|               | Hoe heftig was deze gebeurtenis?                                                                                            | How intense was this event?                                                                                   | Helemaal niet - heel erg                         | Not at all - very much                  | Reward sensitivity               | [11]         |
|               | De plezierige ervaring had te maken met:                                                                                    | The pleasant event concerned:                                                                                 | [String (optioneel), max 280 karakters]          | [String (optional), max 280 characters] | Qualitative description of event | [11]         |
|               | Denk aan de meest onplezierige gebeurtenis of activiteit sinds het vorige meetmoment. Hoe onplezierig was deze gebeurtenis? | Think of the most unpleasant event or activity since the previous measurement. How unpleasant was this event? | Helemaal niet onplezierig - heel erg onplezierig | Not unpleasant at all - very unpleasant | Stress reactivity                | [11, 12, 19] |
|               | Hoe heftig was deze gebeurtenis?                                                                                            | How intense was this event?                                                                                   | Helemaal niet - heel erg                         | Not at all - very much                  | Stress reactivity                | [11]         |

|                                             | De onplezierige ervaring had te maken met                      | The unpleasant event concerned:                                       | [String (optioneel), max 280 karakters] | [String (optional), max 280 characters] | Qualitative description of event | [11]             |
|---------------------------------------------|----------------------------------------------------------------|-----------------------------------------------------------------------|-----------------------------------------|-----------------------------------------|----------------------------------|------------------|
| <b>Main construct: Anxiety</b>              |                                                                |                                                                       |                                         |                                         |                                  |                  |
| <b>Subconstruct</b>                         | <b>EMA item (NL)</b>                                           | <b>EMA item (EN)</b>                                                  | <b>Response scale (NL)</b>              | <b>Response scale (EN)</b>              | <b>Construct</b>                 | <b>Reference</b> |
|                                             | Op dit moment voel ik me veilig                                | Right now, I feel safe                                                | Helemaal niet - heel erg                | Not at all - very much                  | Feeling safe                     | [20]             |
|                                             | Op dit moment voel ik me gespannen                             | Right now, I feel tense                                               | Helemaal niet - heel erg                | Not at all - very much                  | Stressed feeling                 | [19]             |
|                                             | Sinds het vorige meetmoment heb ik gepiekerd                   | Since the previous measurement, I have worried                        | Helemaal niet - heel erg                | Not at all - very much                  | Worrying                         | [10, 11]         |
|                                             | Sinds het vorige meetmoment heb ik iets afgezegd of vermeden   | Since the previous measurement, I have cancelled or avoided something | Helemaal niet - heel erg                | Not at all - very much                  | Avoidance                        | [21]             |
|                                             | Op dit moment ben ik bang om alleen te zijn                    | Right now, I am scared of being alone                                 | Helemaal niet - heel erg                | Not at all - very much                  | Anxiety for being alone          | [21]             |
| <b>Intrusions and compulsive complaints</b> | Sinds het vorige meetmoment had ik last van nare herinneringen | Since the previous measurement, I had intrusive memories              | Helemaal niet - heel erg                | Not at all - very much                  | Intrusions                       | [21]             |
|                                             | Sinds het vorige meetmoment heb ik dwangklachten gehad         | Since the previous measurement, I had compulsive complaints           | Helemaal niet - heel erg                | Not at all - very much                  | Compulsive complaints            | [21]             |
| <b>Panic</b>                                | Op dit moment ben ik bang dat ik een paniekaanval krijg        | Right now, I am scared of having a panic attack                       | Helemaal niet - heel erg                | Not at all - very much                  | Anxiety for panic attacks        | [21]             |
|                                             | Sinds het vorige meetmoment had ik last van panieklachten      | Since the previous measurement, I had panic complaints (f.e.,         | Helemaal niet - heel erg                | Not at all - very much                  | Physical anxiety complaints      | [21]             |



|                                  | (bijv. hartkloppingen, zweten, misselijkheid)                                     | heart palpitations, sweating, nausea)                                                               |                                                                                                                                                                                                                                                                                                                                                         |                                                                                                                                                                                                                                                                                                                                                         |                            |                   |
|----------------------------------|-----------------------------------------------------------------------------------|-----------------------------------------------------------------------------------------------------|---------------------------------------------------------------------------------------------------------------------------------------------------------------------------------------------------------------------------------------------------------------------------------------------------------------------------------------------------------|---------------------------------------------------------------------------------------------------------------------------------------------------------------------------------------------------------------------------------------------------------------------------------------------------------------------------------------------------------|----------------------------|-------------------|
| <b>Derealization</b>             | Op dit moment voel ik me onwerkelijk                                              | Right now, I feel surreal                                                                           | Helemaal niet - heel erg                                                                                                                                                                                                                                                                                                                                | Not at all - very much                                                                                                                                                                                                                                                                                                                                  | Derealization              | [21]              |
|                                  | Op dit moment ben ik bang om de controle te verliezen                             | Right now, I am scared of losing control                                                            | Helemaal niet - heel erg                                                                                                                                                                                                                                                                                                                                | Not at all - very much                                                                                                                                                                                                                                                                                                                                  | Anxiety for losing control | [21]              |
| <b>Main construct: Psychosis</b> |                                                                                   |                                                                                                     |                                                                                                                                                                                                                                                                                                                                                         |                                                                                                                                                                                                                                                                                                                                                         |                            |                   |
| <b>Subconstruct</b>              | <b>EMA item (NL)</b>                                                              | <b>EMA item (EN)</b>                                                                                | <b>Response scale (NL)</b>                                                                                                                                                                                                                                                                                                                              | <b>Response scale (EN)</b>                                                                                                                                                                                                                                                                                                                              | <b>Construct</b>           | <b>Reference</b>  |
| <b>Hearing voices</b>            | Sinds het vorige meetmoment hoorde ik stemmen                                     | Since the previous measurement, I heard voices                                                      | - Ja<br>- Nee                                                                                                                                                                                                                                                                                                                                           | - Yes<br>- No                                                                                                                                                                                                                                                                                                                                           | Hearing voices             | [20]              |
| (if yes on first item)           | Sinds het vorige meetmoment had ik last van de stemmen                            | Since the previous measurement, I was bothered by the voices                                        | Helemaal niet - heel erg                                                                                                                                                                                                                                                                                                                                | Not at all - very much                                                                                                                                                                                                                                                                                                                                  | Bothered by the voices     | Adapted from [22] |
| (if yes on first item)           | Wat was de voornaamste copingstrategie die je hebt gebruikt tegen de stemmenlast? | What was your main coping strategy that you used against the burdens you experienced by the voices? | <b>Checklist: (één optie mogelijk)</b><br>- Doen wat de stemmen zeggen<br>- In gesprek gaan met de stemmen<br>- De stemmen wegsturen of zeggen te stoppen<br>- Afleiding door iets sociaals<br>- Afleiding door iets taligs (bijv. lezen, zingen)<br>- Afleiding door werkgeheugenbelasting (bijv. TemStem, woordpuzzel)<br>- Blowen of alcohol drinken | <b>Checklist (one option possible)</b><br>- Do what voices say<br>- Talk to voices<br>- Send voices away or order to stop<br>- Distract by doing something social<br>- Distract by something verbal (f.e., reading, singing)<br>- Distract by taxing the working memory (f.e., TemStem, word puzzle)<br>- Using drugs or alcohol<br>- Taking medication | Coping with the voices     | Adapted from [22] |

|                        |                                                                                     |                                                                                       |                                                                                                                                                                                                                                              |                                                                                                                                                                                                                     |                                  |                   |
|------------------------|-------------------------------------------------------------------------------------|---------------------------------------------------------------------------------------|----------------------------------------------------------------------------------------------------------------------------------------------------------------------------------------------------------------------------------------------|---------------------------------------------------------------------------------------------------------------------------------------------------------------------------------------------------------------------|----------------------------------|-------------------|
|                        |                                                                                     |                                                                                       | <ul style="list-style-type: none"> <li>- Medicatie innemen</li> <li>- Iets ontspannens (bijv. sporten, muziek luisteren)</li> <li>- Geruststellende gedachten</li> <li>- Ik gebruikte geen copingstrategie</li> <li>- Iets anders</li> </ul> | <ul style="list-style-type: none"> <li>- Something relaxing (f.e., doing sports, listening to music)</li> <li>- Reassuring thoughts</li> <li>- I did not use a coping strategy</li> <li>- Something else</li> </ul> |                                  |                   |
| (if yes on first item) | In welke mate heeft deze copingstrategie je geholpen de stemmenlast te verminderen? | To what extent has the coping strategy helped you to reduce the burden of the voices? | Helemaal niet - heel erg                                                                                                                                                                                                                     | Not at all - very much                                                                                                                                                                                              | Effectivity of coping strategies | Adapted from [22] |
| (if yes on first item) | De stemmen maakten mij boos                                                         | The voices made me angry                                                              | Helemaal niet - heel erg                                                                                                                                                                                                                     | Not at all - very much                                                                                                                                                                                              | Emotions due to the voices       | Adapted from [22] |
| (if yes on first item) | De stemmen maakten mij blij                                                         | The voices made me happy                                                              | Helemaal niet - heel erg                                                                                                                                                                                                                     | Not at all - very much                                                                                                                                                                                              | Emotions due to the voices       | Adapted from [22] |
| (if yes on first item) | De stemmen maakten mij bedroefd                                                     | The voices made me sad                                                                | Helemaal niet - heel erg                                                                                                                                                                                                                     | Not at all - very much                                                                                                                                                                                              | Emotions due to the voices       | Adapted from [22] |
| (if yes on first item) | De stemmen maakten mij beschaamd                                                    | The voices made me feel ashamed                                                       | Helemaal niet - heel erg                                                                                                                                                                                                                     | Not at all - very much                                                                                                                                                                                              | Emotions due to the voices       | Adapted from [22] |
| (if yes on first item) | De stemmen maakten mij bang                                                         | The voices scared me                                                                  | Helemaal niet - heel erg                                                                                                                                                                                                                     | Not at all - very much                                                                                                                                                                                              | Emotions due to the voices       | Adapted from [22] |
| <b>Delusions</b>       | Op dit moment voel ik me wantrouwig                                                 | Right now, I feel suspicious                                                          | Helemaal niet - heel erg                                                                                                                                                                                                                     | Not at all - very much                                                                                                                                                                                              | Paranoid delusion                | [13, 17, 20]      |
|                        | Op dit moment voel ik me veilig                                                     | Right now, I feel safe                                                                | Helemaal niet - heel erg                                                                                                                                                                                                                     | Not at all - very much                                                                                                                                                                                              | Paranoid delusion                | [20]              |
|                        | Op dit moment lijkt alles betekenis te hebben                                       | Right now, I feel as if                                                               | Helemaal niet - heel erg                                                                                                                                                                                                                     | Not at all - very much                                                                                                                                                                                              | Verhoogde betekenisgeving        | [13]              |
|                        | Op dit moment voel ik me onwerkelijk                                                | Right now, I feel surreal                                                             | Helemaal niet - heel erg                                                                                                                                                                                                                     | Not at all - very much                                                                                                                                                                                              | Derealization                    | [21]              |

|                                          | Het is weer bezig                                          | It is going on again                                     | Helemaal niet - heel erg                                                                                                                                                                                                                                                                                                                                                                                                                              | Not at all - very much                                                                                                                                                                                                                                                                                                                                                                                 | Person-specific delusion | [23]              |
|------------------------------------------|------------------------------------------------------------|----------------------------------------------------------|-------------------------------------------------------------------------------------------------------------------------------------------------------------------------------------------------------------------------------------------------------------------------------------------------------------------------------------------------------------------------------------------------------------------------------------------------------|--------------------------------------------------------------------------------------------------------------------------------------------------------------------------------------------------------------------------------------------------------------------------------------------------------------------------------------------------------------------------------------------------------|--------------------------|-------------------|
|                                          | Op dit moment worden mijn gedachten door anderen beïnvloed | Right now, my thoughts are influenced by others          | Helemaal niet - heel erg                                                                                                                                                                                                                                                                                                                                                                                                                              | Not at all - very much                                                                                                                                                                                                                                                                                                                                                                                 | Beïnvloedingsw aan       | [13, 17, 20]      |
| <b>Main construct: Bodily complaints</b> |                                                            |                                                          |                                                                                                                                                                                                                                                                                                                                                                                                                                                       |                                                                                                                                                                                                                                                                                                                                                                                                        |                          |                   |
| <b>Subconstruct</b>                      | <b>EMA item (NL)</b>                                       | <b>EMA item (EN)</b>                                     | <b>Response scale (NL)</b>                                                                                                                                                                                                                                                                                                                                                                                                                            | <b>Response scale (EN)</b>                                                                                                                                                                                                                                                                                                                                                                             | <b>Construct</b>         | <b>Reference</b>  |
| <b>Bodily complaints</b>                 | Sinds het vorige meetmoment heb ik last gehad van:         | Since the previous measurement, I have been bothered by: | <b>Checklist (meerdere opties mogelijk):</b><br>- Ademhalingsproblemen (kortademigheid, moeilijk adem kunnen krijgen)<br>- Pijn of drukkend gevoel op de borst<br>- Hartkloppingen<br>- Misselijkheid of maag die van streek is<br>- Verstopping, dunne ontlasting of diarree<br>- Pijn in de buik of maagstreek<br>- Hoofdpijn<br>- Duizeligheid<br>- Vermoeidheid<br>- Rugpijn<br>- Pijn in spieren of gewrichten<br>- Verdoofd of tintelend gevoel | <b>Checklist (multiple responses possible):</b><br>- Trouble breathing (shortness of breath, breathing difficulties)<br>- Pain or pressing feeling on the chest<br>- Heart palpitations<br>- Nausea or upset stomach<br>- Constipation, diarrhea<br>- Abdominal pain or stomachaches<br>- Headache<br>- Dizziness<br>- Fatigue<br>- Back pain<br>- Pain in joints or muscles<br>- Numbness or tingling | Bodily complaints        | Adapted from [24] |
| (for each selected complaint)            | Hoeveel had je last van [klacht]                           | How much were you bothered by [complaint]                | Helemaal niet - heel erg                                                                                                                                                                                                                                                                                                                                                                                                                              | Not at all - very much                                                                                                                                                                                                                                                                                                                                                                                 | Bodily complaints        | [25]              |

|  |                                                                                           |                                                                                |                          |                        |                                            |      |
|--|-------------------------------------------------------------------------------------------|--------------------------------------------------------------------------------|--------------------------|------------------------|--------------------------------------------|------|
|  | Sinds het vorige meetmoment was ik in gedachten veel met mijn lichamelijke klachten bezig | Since the previous measurement, I was preoccupied by my bodily complaints      | Helemaal niet - heel erg | Not at all - very much | Preoccupation with bodily complaints       | [25] |
|  | Sinds het vorige meetmoment zocht ik afleiding van mijn lichamelijke klachten             | Since the previous measurement, I sought distraction from my bodily complaints | Helemaal niet - heel erg | Not at all - very much | Seeking distraction from bodily complaints | [25] |
|  | Sinds het vorige meetmoment voelde ik mij belemmerd door mijn lichamelijke klachten       | Since the previous measurement, I felt hindered by my bodily complaints        | Helemaal niet - heel erg | Not at all - very much | Feeling hindered by bodily complaints      | [25] |

| <b>Main construct: Reduced interest</b>               |                                                                                                            |                                                                                                        |                                       |                            |                      |                  |
|-------------------------------------------------------|------------------------------------------------------------------------------------------------------------|--------------------------------------------------------------------------------------------------------|---------------------------------------|----------------------------|----------------------|------------------|
| <b>Subconstruct</b>                                   | <b>EMA item (NL)</b>                                                                                       | <b>EMA item (EN)</b>                                                                                   | <b>Response scale (NL)</b>            | <b>Response scale (EN)</b> | <b>Construct</b>     | <b>Reference</b> |
| <b>Reduced interest and initiative</b>                | Ik heb zin in de rest van de dag                                                                           | I look forward to the rest of the day                                                                  | Helemaal niet - heel erg              | Not at all - very much     | Anticipatory reward  | [2]              |
|                                                       | Op dit moment heb ik zin om met anderen te zijn                                                            | Right now, I feel like being with others                                                               | Helemaal niet - heel erg              | Not at all - very much     | Need for socializing | [10]             |
|                                                       | Op dit moment voel ik me lusteloos                                                                         | Right now, I feel listless                                                                             | Helemaal niet - heel erg              | Not at all - very much     | Anhedonia            | [10, 12]         |
| <b>Main construct: Surroundings, behavior, agents</b> |                                                                                                            |                                                                                                        |                                       |                            |                      |                  |
| <b>Subconstruct</b>                                   | <b>EMA item (NL)</b>                                                                                       | <b>EMA item (EN)</b>                                                                                   | <b>Response scale (NL)</b>            | <b>Response scale (EN)</b> | <b>Construct</b>     | <b>Reference</b> |
| <b>Events</b>                                         | Denk aan de meest plezierige gebeurtenis of activiteit sinds het vorige meetmoment. Hoe plezierig was dit? | Think of the most pleasant event or activity since the previous measurement. How pleasurable was this? | Helemaal niet - heel erg<br>plezierig | Not at all - very pleasant | Reward sensitivity   | [11, 19]         |

|                 |                                                                                                                |                                                                                                         |                                                                                                                                                                                                                                                                                                         |                                                                                                                                                                                                                                                                                                                                     |                                  |          |
|-----------------|----------------------------------------------------------------------------------------------------------------|---------------------------------------------------------------------------------------------------------|---------------------------------------------------------------------------------------------------------------------------------------------------------------------------------------------------------------------------------------------------------------------------------------------------------|-------------------------------------------------------------------------------------------------------------------------------------------------------------------------------------------------------------------------------------------------------------------------------------------------------------------------------------|----------------------------------|----------|
|                 | Hoe heftig was deze gebeurtenis of activiteit?                                                                 | How intense was this event?                                                                             | Helemaal niet - heel erg                                                                                                                                                                                                                                                                                | Not at all - very much                                                                                                                                                                                                                                                                                                              | Reward sensitivity               | [11]     |
|                 | De plezierige ervaring had te maken met:                                                                       | The pleasant event concerned:                                                                           | [String (optioneel), max 280 karakters]                                                                                                                                                                                                                                                                 | [String (optional), max 280 characters]                                                                                                                                                                                                                                                                                             | Qualitative description of event | [11, 19] |
|                 | Denk aan de meest onplezierige gebeurtenis of activiteit sinds het vorige meetmoment. Hoe onplezierig was dit? | Think of the most unpleasant event or activity since the previous measurement. How unpleasant was this? | Helemaal niet - heel erg onplezierig                                                                                                                                                                                                                                                                    | Not at all – very unpleasant                                                                                                                                                                                                                                                                                                        | Stress reactivity                | [11]     |
|                 | Hoe heftig was dit?                                                                                            | How intense was this?                                                                                   | Helemaal niet - heel erg                                                                                                                                                                                                                                                                                | Not at all - very much                                                                                                                                                                                                                                                                                                              | Stress reactivity                | [11]     |
|                 | De onplezierige gebeurtenis had te maken met                                                                   | The unpleasant event concerned:                                                                         | [String (optioneel), max 280 karakters]                                                                                                                                                                                                                                                                 | [String (optional), max 280 characters]                                                                                                                                                                                                                                                                                             | Qualitative description of event | [11]     |
| <b>Activity</b> | Op dit moment, wat doe ik?                                                                                     | Right now, what am I doing?                                                                             | <b>Checklist (één optie mogelijk):</b><br>- Werken/studeren<br>- Sporten/wandelen/fietsen<br>- Hobby (bijv. muziek maken, klussen)<br>- Uitje (bijv. naar de stad, concert)<br>- Iets rustigs (bijv. lezen, tv kijken)<br>- Met iemand praten<br>- Iets intiems (bijv. knuffelen, seks)<br>- Whatsappen | <b>Checklist (one option possible):</b><br>- Working/studying<br>- Doing sports/walking/biking<br>- Hobby (f.e., making music, DIY)<br>- Outing (f.e., going into the city or a concert)<br>- Something relaxing (f.e., reading, watching TV)<br>- Talking to someone<br>- Something intimate (cuddling, sex)<br>- Whatsapp/texting | (social) context                 | [9-11]   |

|                     |                                                               |                                                               |                                                                                                                                                                                                                                                                              |                                                                                                                                                                                                                                                                                                                                           |                   |              |
|---------------------|---------------------------------------------------------------|---------------------------------------------------------------|------------------------------------------------------------------------------------------------------------------------------------------------------------------------------------------------------------------------------------------------------------------------------|-------------------------------------------------------------------------------------------------------------------------------------------------------------------------------------------------------------------------------------------------------------------------------------------------------------------------------------------|-------------------|--------------|
|                     |                                                               |                                                               | <ul style="list-style-type: none"> <li>- Social Media</li> <li>- Eten</li> <li>- Huishouden/<br/>boodschappen/<br/>administratie</li> <li>- Zelfverzorging (bijv.<br/>douchen, opmaken)</li> <li>- Rusten/niets</li> <li>- Ik ben onderweg</li> <li>- Iets anders</li> </ul> | <ul style="list-style-type: none"> <li>- Social Media</li> <li>- Eating</li> <li>- Household chores/<br/>grocery shopping/<br/>administration</li> <li>- Self-care (f.e., showering,<br/>applying make-up)</li> <li>- Resting/nothing</li> <li>- Travelling, or moving from<br/>one place to another</li> <li>- Something else</li> </ul> |                   |              |
|                     | Sinds het vorige meetmoment, wat heb ik gedaan?               | Since the previous measurement, what have I been doing?       | <b>Checklist (meerdere opties mogelijk):</b><br>[Hetzelfde als bovenstaand item]                                                                                                                                                                                             | <b>Checklist (multiple responses possible):</b><br>[same as previous item]                                                                                                                                                                                                                                                                |                   | [9-11]       |
|                     | Deze activiteit vind ik...                                    | I find this activity...                                       | Zeer onplezierig - zeer plezierig                                                                                                                                                                                                                                            | Very unpleasant – very pleasant                                                                                                                                                                                                                                                                                                           |                   | [9-11]       |
|                     | Sinds het vorige meetmoment ben ik lichamelijk actief geweest | Since the previous measurement, I have been physically active | Helemaal niet - heel erg                                                                                                                                                                                                                                                     | Not at all - very much                                                                                                                                                                                                                                                                                                                    | Physical activity | [10, 11, 26] |
| <b>Surroundings</b> | Sinds het vorige meetmoment ben ik buiten geweest             | Since the previous measurement, I have been outside           | <ul style="list-style-type: none"> <li>- Ja</li> <li>- Nee</li> </ul>                                                                                                                                                                                                        | <ul style="list-style-type: none"> <li>- Yes</li> <li>- No</li> </ul>                                                                                                                                                                                                                                                                     | Being outside     | [21]         |
|                     | Op dit moment, waar ben ik?                                   | Right now, where am I?                                        | <b>Checklist (één optie mogelijk):</b> <ul style="list-style-type: none"> <li>- Thuis</li> <li>- School/werk</li> <li>- Bij familie/vrienden</li> <li>- Café, bibliotheek, park</li> <li>- Supermarkt/winkel</li> </ul>                                                      | <b>Checklist (one option possible):</b> <ul style="list-style-type: none"> <li>- Home</li> <li>- School/work</li> <li>- Family/friends</li> <li>- Cafe/library/park</li> <li>- Supermarket/shop</li> </ul>                                                                                                                                | Location          | [9]          |

|                                       |                                                                  |                                                                      |                                                                                                                                                                                                                                                                                                                                                                        |                                                                                                                                                                                                                                                                                                                                                 |                           |      |
|---------------------------------------|------------------------------------------------------------------|----------------------------------------------------------------------|------------------------------------------------------------------------------------------------------------------------------------------------------------------------------------------------------------------------------------------------------------------------------------------------------------------------------------------------------------------------|-------------------------------------------------------------------------------------------------------------------------------------------------------------------------------------------------------------------------------------------------------------------------------------------------------------------------------------------------|---------------------------|------|
|                                       |                                                                  |                                                                      | <ul style="list-style-type: none"> <li>- In de natuur</li> <li>- Hulpverlening</li> <li>- Onderweg</li> <li>- Ergens anders</li> </ul>                                                                                                                                                                                                                                 | <ul style="list-style-type: none"> <li>- Nature</li> <li>- Health facility</li> <li>- Travelling, or moving from one place to another</li> <li>- Somewhere else</li> </ul>                                                                                                                                                                      |                           |      |
|                                       |                                                                  |                                                                      |                                                                                                                                                                                                                                                                                                                                                                        |                                                                                                                                                                                                                                                                                                                                                 |                           |      |
| <b>Food, agents, and side-effects</b> | Sinds het vorige meetmoment heb ik de volgende middelen gebruikt | Since the previous measurement, I have taken the following           | <b>Checklist (meerdere opties mogelijk):</b> <ul style="list-style-type: none"> <li>- Geen</li> <li>- Sigaretten</li> <li>- Koffie of energydrink</li> <li>- Alcohol</li> <li>- Snacks</li> <li>- Snoep</li> <li>- Cannabis</li> <li>- Medicatie</li> </ul>                                                                                                            | <b>Checklist (multiple responses possible):</b> <ul style="list-style-type: none"> <li>- None</li> <li>- Cigarettes</li> <li>- Coffee or energy drink</li> <li>- Alcohol</li> <li>- Snacks</li> <li>- Candy</li> <li>- Cannabis</li> <li>- Medication</li> </ul>                                                                                | Middelen/medicatiegebruik | [17] |
|                                       | Sinds het vorige meetmoment heb ik deze ervaring(en) gehad       | Since the previous measurement, I have had the following experiences | <b>Checklist (meerdere opties mogelijk):</b> <ul style="list-style-type: none"> <li>- Hoofdpijn</li> <li>- Hongergevoel</li> <li>- Misselijkheid</li> <li>- Suf of slaperig</li> <li>- Pijnlijke of stijve spieren</li> <li>- Onrust van binnen</li> <li>- Duizelig</li> <li>- Droge mond</li> <li>- Vlak</li> <li>- Traag</li> <li>- Geen van bovenstaande</li> </ul> | <b>Checklist (multiple responses possible):</b> <ul style="list-style-type: none"> <li>- Headache</li> <li>- Hunger</li> <li>- Nausea</li> <li>- Drowsy or sleepy</li> <li>- Painful or stiff muscles</li> <li>- Restlessness</li> <li>- Dizziness</li> <li>- Dry mouth</li> <li>- Flat</li> <li>- Slow</li> <li>- None of the above</li> </ul> | Medication side-effects   | [21] |
|                                       |                                                                  |                                                                      |                                                                                                                                                                                                                                                                                                                                                                        |                                                                                                                                                                                                                                                                                                                                                 |                           |      |
| <b>Food</b>                           | Sinds het vorige meetmoment heb ik het volgende gegeten          | Since the previous measurement, I have eaten the following           | <b>Checklist (meerdere opties mogelijk):</b> <ul style="list-style-type: none"> <li>- Broodmaaltijd</li> </ul>                                                                                                                                                                                                                                                         | <b>Checklist (multiple responses possible):</b> <ul style="list-style-type: none"> <li>- Sandwich</li> </ul>                                                                                                                                                                                                                                    | Food type                 | [21] |

|                                        |                                                                   |                                                                                       | - Gezond tussendoortje<br>- Warme maaltijd<br>- Snoep<br>- Snacks<br>- Niets                                                                                                                             | - Healthy snack<br>- Hot meal<br>- Candy<br>- Snack<br>- Nothing                                                                                                                                          |                      |                  |
|----------------------------------------|-------------------------------------------------------------------|---------------------------------------------------------------------------------------|----------------------------------------------------------------------------------------------------------------------------------------------------------------------------------------------------------|-----------------------------------------------------------------------------------------------------------------------------------------------------------------------------------------------------------|----------------------|------------------|
|                                        | Sinds het vorige meetmoment heb ik gegeten...                     | Since the previous measurement, I have eaten...                                       | Veel minder dan normaal - veel meer dan normaal                                                                                                                                                          | A lot less than usual – a lot more than usual                                                                                                                                                             | Food quantity        | [21]             |
|                                        | Sinds het vorige meetmoment heb ik gezond gegeten                 | Since the previous measurement, I have eaten healthily                                | Helemaal niet - heel erg                                                                                                                                                                                 | Not at all - very much                                                                                                                                                                                    | Health level of food | [21]             |
| <b>Hoofdthema: Social interactions</b> |                                                                   |                                                                                       |                                                                                                                                                                                                          |                                                                                                                                                                                                           |                      |                  |
| <b>Subconstruct</b>                    | <b>EMA item (NL)</b>                                              | <b>EMA item (EN)</b>                                                                  | <b>Response scale (NL)</b>                                                                                                                                                                               | <b>Response scale (EN)</b>                                                                                                                                                                                | <b>Construct</b>     | <b>Reference</b> |
| <b>Company</b>                         | Op dit moment ben ik...                                           | Right now, I am...                                                                    | <b>Checklist (één optie mogelijk):</b><br>- Alleen<br>- Alleen met huisdier<br>- In gezelschap                                                                                                           | <b>Checklist (one response possible):</b><br>- Alone<br>- Alone with pet<br>- In company                                                                                                                  | Alone/with others    | [11]             |
| (if in company)                        | Op dit moment, met wie ben ik?                                    | Right now, with whom am I?                                                            | <b>Checklist (meerdere opties mogelijk):</b><br>- Partner<br>- Huisgenoten<br>- Gezin<br>- Familie uitwonend<br>- Vrienden<br>- Collega's/ klasgenoten<br>- Hulpverleners<br>- Kennissen<br>- Onbekenden | <b>Checklist (multiple responses possible):</b><br>- Partner<br>- House mates<br>- Family<br>- Extended family<br>- Friends<br>- Colleagues/class mates<br>- Clinicians<br>- Acquaintances<br>- Strangers | Company type         | [9, 11, 13]      |
| (if in company)                        | Vul hier in met wie je bent. <i>NB: noteer hier geen namen en</i> | Indicate with whom you are. <i>Note: do not mention names here. Remember privacy.</i> | [String (optioneel), max 280 karakters]                                                                                                                                                                  | [String (optional), max 280 characters]                                                                                                                                                                   |                      | [27-29]          |



|                       |                                                                                                                            |                                                                                                                                    |                          |                        |                               |             |
|-----------------------|----------------------------------------------------------------------------------------------------------------------------|------------------------------------------------------------------------------------------------------------------------------------|--------------------------|------------------------|-------------------------------|-------------|
|                       | <i>dergelijke. Denk om privacy.</i>                                                                                        |                                                                                                                                    |                          |                        |                               |             |
| (if in company)       | Ik vind dit gezelschap aangenaam                                                                                           | I find this company agreeable                                                                                                      | Helemaal niet - heel erg | Not at all - very much | Social stress                 | [9, 11, 30] |
| (if in company)       | Ik heb het gevoel dat deze mensen me mogen                                                                                 | I feel these people like me                                                                                                        | Helemaal niet - heel erg | Not at all - very much | Social stress                 | [30]        |
| (if alone)            | Ik was liever in gezelschap geweest                                                                                        | I'd rather have been in company                                                                                                    | Helemaal niet - heel erg | Not at all - very much | Social stress                 | [13, 30]    |
| (if alone)            | Ik vind het fijn om nu alleen te zijn                                                                                      | Right now, I like being alone                                                                                                      | Helemaal niet - heel erg | Not at all - very much | Social stress                 | [30]        |
| (if in company)       | Ik voel me geaccepteerd in dit gezelschap                                                                                  | I feel accepted by this company                                                                                                    | Helemaal niet - heel erg | Not at all - very much | Social stress                 | [11, 30]    |
| (if in company)       | Ik voel me op mijn gemak in dit gezelschap                                                                                 | I feel at ease in this company                                                                                                     | Helemaal niet - heel erg | Not at all - very much | Social stress                 | [30]        |
| <b>Connected-ness</b> | Sinds het vorige meetmoment voelde ik me eenzaam                                                                           | Since the previous measurement, I have felt lonely                                                                                 | Helemaal niet - heel erg | Not at all - very much | Loneliness                    | [9, 13]     |
|                       | Op dit moment voel ik dat ik om anderen geef                                                                               | Right now, I feel I care for others                                                                                                | Helemaal niet - heel erg | Not at all - very much | Caring for others             | [27-29]     |
|                       | Op dit moment voel ik dat anderen om mij geven                                                                             | Right now, I feel that others care about me                                                                                        | Helemaal niet - heel erg | Not at all - very much | Feeling others care about you | [17, 27-29] |
|                       | Op dit moment voel ik me verbonden met anderen                                                                             | Right now, I feel connected with others                                                                                            | Helemaal niet - heel erg | Not at all - very much | Feeling connected             | [27-29]     |
| <b>Interactions</b>   | Heb je sinds het vorige meetmoment gesprekken gehad? <i>Gesprekken duren langer dan 5 minuten. Dit kunnen face-to-face</i> | Since the previous measurement, did you have interactions? <i>Interactions last longer than 5 minutes, and can be face-to-face</i> | - Ja<br>- Nee            | - Yes<br>- No          | Had interactions              | [27-29]     |

|  |                                                                                                                                                                                 |                                                                                                                                                                               |                                                                                                                                                                              |                                                                                                                                                                     |                                                   |         |
|--|---------------------------------------------------------------------------------------------------------------------------------------------------------------------------------|-------------------------------------------------------------------------------------------------------------------------------------------------------------------------------|------------------------------------------------------------------------------------------------------------------------------------------------------------------------------|---------------------------------------------------------------------------------------------------------------------------------------------------------------------|---------------------------------------------------|---------|
|  | <i>gesprekken of gesprekken via online (sociale) media zijn.</i>                                                                                                                | <i>interactions or via online (social) media.</i>                                                                                                                             |                                                                                                                                                                              |                                                                                                                                                                     |                                                   |         |
|  | Sinds het vorige meetmoment, hoeveel gesprekken heb je gehad?                                                                                                                   | Since the previous measurement, how many interactions did you have?                                                                                                           | [Geef getal aan]                                                                                                                                                             | [indicate number]                                                                                                                                                   | Number of interactions                            | [27-29] |
|  | Denk aan het voor jou meest belangrijk gesprek sinds het vorige meetmoment. Met wie heb je dit gesprek gehad? <i>NB: noteer hier geen namen en dergelijke. Denk om privacy.</i> | Think about the most important interaction since the previous measurement. With whom did you have this interaction? <i>Note: do not mention names here. Remember privacy.</i> | [String (optioneel), max 280 karakters]                                                                                                                                      | [String (optional), max 280 characters]                                                                                                                             | Interaction partner                               | [27-29] |
|  | Wat voor gesprek was dit?                                                                                                                                                       | What kind of interaction was this?                                                                                                                                            | <b>Checklist (één optie mogelijk):</b><br>- Face-to-face<br>- Telefoongesprek<br>- Videobelgesprek<br>- Gesprek via email of sociale media (bijv. Whatsapp)<br>- iets anders | <b>Checklist (one option possible):</b><br>- Face-to-face<br>- By phone<br>- By video messaging<br>- By e-mail or social media (f.e., whatsapp)<br>- Something else | Medium                                            | [27-29] |
|  | Hoe belangrijk was dit gesprek voor je?                                                                                                                                         | How important was this interaction for you?                                                                                                                                   | Helemaal niet - heel erg                                                                                                                                                     | Not at all - very much                                                                                                                                              | Interaction importance                            | [27-29] |
|  | Wat maakte dit gesprek belangrijk en waar ging het over?                                                                                                                        | What made this interaction important and what was it about?                                                                                                                   | [String (optioneel), max 280 karakters]                                                                                                                                      | [String (optional), max 280 characters]                                                                                                                             | Qualitative description of interaction importance | [27-29] |

|  |                                                                                                                                    |                                                                                                                    |                                                                  |                                                         |                                         |         |
|--|------------------------------------------------------------------------------------------------------------------------------------|--------------------------------------------------------------------------------------------------------------------|------------------------------------------------------------------|---------------------------------------------------------|-----------------------------------------|---------|
|  | Hoe lang duurde het gesprek?                                                                                                       | What was the duration of the interaction?                                                                          | [Geef getal aan (minuten)]                                       | [Indicate number (minutes)]                             | Interaction duration                    | [27-29] |
|  | Hoe (on)plezierig was de inhoud van het gesprek?                                                                                   | How (un)pleasant was the content of the interaction?                                                               | Heel erg onplezierig – heel erg plezierig                        | Very unpleasant – very pleasant                         | (Un)pleasantness of interaction content | [27-29] |
|  | Hoe (on)plezierig heb je het gesprek zelf ervaren? <i>Denk hierbij bijvoorbeeld aan de houding en toon van je gesprekspartner.</i> | How (un)pleasant was the interaction itself? <i>Think about the attitude and tone of your interaction partner.</i> | Heel erg onplezierig – heel erg plezierig                        | Very unpleasant – very pleasant                         | (Un)pleasantness of interaction itself  | [27-29] |
|  | In hoeverre beïnvloedde het gesprek je stemming?                                                                                   | To what extent did the interaction influence your mood?                                                            | Mijn stemming werd veel slechter - mijn stemming werd veel beter | My mood worsened a lot – my mood improved a lot         | Impact of interaction on mood           | [27-29] |
|  | In hoeverre beïnvloedde het gesprek je energieniveau?                                                                              | To what extent did the interaction influence your energy level?                                                    | Het kostte me veel energie - Het leverde me veel energie op      | It cost me a lot of energy – it gave me a lot of energy | Impact of interaction on energy level   | [27-29] |
|  | In hoeverre kon je jezelf zijn in dit gesprek?                                                                                     | To what extent could you be yourself in this interaction?                                                          | Helemaal niet - heel erg                                         | Not at all - very much                                  | Being yourself                          | [27-29] |
|  | Ik voelde me gesteund door mijn gesprekspartner(s)                                                                                 | I felt supported by my interaction partner(s).                                                                     | Helemaal niet - heel erg                                         | Not at all - very much                                  | Feeling supported                       | [27-29] |
|  | Is er sinds het vorige meetmoment nog een ander gesprek geweest dat je graag wilt beschrijven?                                     | Has there been another interaction since the previous measurement that you would like to describe?                 | - Ja<br>- Nee<br>[indien ja, herhaal vorige items]               | - Yes<br>- No<br>[if yes, repeat previous items]        | Another interaction                     | [27-29] |

**Main construct: Worrying**

| Subconstruct | EMA item (NL) | EMA item (EN) | Response scale (NL) | Response scale (EN) | Construct | Reference |
|--------------|---------------|---------------|---------------------|---------------------|-----------|-----------|
|--------------|---------------|---------------|---------------------|---------------------|-----------|-----------|

|                                    |                                                     |                                                           |                                       |                               |                         |                  |
|------------------------------------|-----------------------------------------------------|-----------------------------------------------------------|---------------------------------------|-------------------------------|-------------------------|------------------|
| <b>Worrying</b>                    | Sinds het vorige meetmoment heb ik gepiekerd        | Since the previous measurement, I have worried            | Helemaal niet - heel erg              | Not at all - very much        | Worrying                | [10, 11]         |
|                                    | Op dit moment laten mijn gedachten me niet los      | Right now, I can't disconnect from my thoughts            | Helemaal niet - heel erg              | Not at all - very much        | Worrying                | [17]             |
| <b>Main construct: Self-esteem</b> |                                                     |                                                           |                                       |                               |                         |                  |
| <b>Subconstruct</b>                | <b>EMA item (NL)</b>                                | <b>EMA item (EN)</b>                                      | <b>Response scale (NL)</b>            | <b>Response scale (EN)</b>    | <b>Construct</b>        | <b>Reference</b> |
| <b>Self-esteem</b>                 | Op dit moment voel ik me goed over mezelf           | Right now, I feel good about myself                       | Helemaal niet - heel erg              | Not at all - very much        | Self-esteem             | [17]             |
|                                    | Op dit moment zijn mijn gedachten over mezelf...    | Right now, my thoughts about myself are...                | Heel erg negatief – heel erg positief | Very negative – very positive | Self-esteem             | [10]             |
|                                    | Op dit moment heb ik het gevoel te kort te schieten | Right now, I feel inadequate                              | Helemaal niet - heel erg              | Not at all - very much        | Self-esteem             | [9, 10]          |
|                                    | Op dit moment voel ik me nuttig                     | Right now, I feel useful                                  | Helemaal niet - heel erg              | Not at all - very much        | Productivity            | [2]              |
| <b>Main construct: Positivity</b>  |                                                     |                                                           |                                       |                               |                         |                  |
| <b>Subconstruct</b>                | <b>EMA item (NL)</b>                                | <b>EMA item (EN)</b>                                      | <b>Response scale (NL)</b>            | <b>Response scale (EN)</b>    | <b>Construct</b>        | <b>Reference</b> |
| <b>Positivity</b>                  | Op dit moment voel ik me goed over mezelf           | Right now, I feel good about myself                       | Helemaal niet - heel erg              | Not at all - very much        | Self-esteem             | [21]             |
|                                    | Op dit moment heb ik zin om met anderen te zijn     | Right now, I feel like socializing                        | Helemaal niet - heel erg              | Not at all - very much        | Need for social contact | [10]             |
|                                    | Op dit moment voel ik me ontspannen                 | Right now, I feel relaxed                                 | Helemaal niet - heel erg              | Not at all - very much        | Feeling relaxed         | [9]              |
|                                    | Op dit moment voel ik me gewaardeerd                | Right now, I feel appreciated                             | Helemaal niet - heel erg              | Not at all - very much        | Feeling appreciated     | [9]              |
|                                    | Sinds het vorige meetmoment heb ik plezier gehad    | Since the previous measurement, I've experienced pleasure | Helemaal niet - heel erg              | Not at all - very much        | Experiencing pleasure   | [9]              |

|                                                     | Ik heb zin in de rest van de dag                                                                     | I look forward to the rest of the day                                                                 | Helemaal niet - heel erg   | Not at all - very much     | Anticipatory reward            | [2, 10]          |
|-----------------------------------------------------|------------------------------------------------------------------------------------------------------|-------------------------------------------------------------------------------------------------------|----------------------------|----------------------------|--------------------------------|------------------|
| <b>Main construct: Formulate your own questions</b> |                                                                                                      |                                                                                                       |                            |                            |                                |                  |
| <b>Subconstruct</b>                                 | <b>EMA item (NL)</b>                                                                                 | <b>EMA item (EN)</b>                                                                                  | <b>Response scale (NL)</b> | <b>Response scale (EN)</b> | <b>Construct</b>               | <b>Reference</b> |
| <b>Formulate your own questions</b>                 | - Op dit moment [typ hier je eigen vraag]<br>- Sinds het vorige meetmoment [typ hier je eigen vraag] | - Right now [enter your question here]<br>- Since the previous measurement [enter your question here] | Helemaal niet - heel erg   | Not at all - very much     | Person-specific item           | [21]             |
|                                                     | - Op dit moment [typ hier je eigen vraag]<br>- Sinds het vorige meetmoment [typ hier je eigen vraag] | - Right now [enter your question here]<br>- Since the previous measurement [enter your question here] | Helemaal niet - heel erg   | Not at all - very much     | Person-specific item           | [21]             |
|                                                     | - Op dit moment [typ hier je eigen vraag]<br>- Sinds het vorige meetmoment [typ hier je eigen vraag] | - Right now [enter your question here]<br>- Since the previous measurement [enter your question here] | Helemaal niet - heel erg   | Not at all - very much     | Person-specific item           | [21]             |
|                                                     | - Op dit moment [typ hier je eigen vraag]<br>- Vandaag [typ hier je eigen vraag]                     | - Right now [enter your question here]<br>- Today [enter your question here]                          | Helemaal niet - heel erg   | Not at all - very much     | Person-specific item (evening) | [21]             |

Once-per-day evening schedule

Constructs, subconstructs, and EMA items

| <u>Main construct: Mood</u>                        |                                                                                                           |                                                                                                                      |                                         |                                         |                                                                                  |                   |
|----------------------------------------------------|-----------------------------------------------------------------------------------------------------------|----------------------------------------------------------------------------------------------------------------------|-----------------------------------------|-----------------------------------------|----------------------------------------------------------------------------------|-------------------|
| Subconstruct                                       | EMA item (NL)                                                                                             | EMA item (EN)                                                                                                        | Response scale (NL)                     | Response scale (EN)                     | Construct                                                                        | Reference         |
| <b>Mood (obligatory)</b>                           | Vandaag was mijn stemming...                                                                              | Today, my mood was...                                                                                                | Heel erg slecht - heel erg goed         | Very bad - very good                    | General mood                                                                     | [18]              |
|                                                    | Vandaag voelde ik me gestrest                                                                             | Today, I felt stressed                                                                                               | Helemaal niet - heel erg                | Not at all - very much                  | Stress                                                                           | [18]              |
|                                                    | Vandaag voelde ik me ontspannen                                                                           | Today, I felt relaxed                                                                                                | Helemaal niet - heel erg                | Not at all - very much                  | Relaxation                                                                       | [18, 31]          |
|                                                    | Vandaag kon ik genieten*                                                                                  | Today, I could enjoy things*                                                                                         | Helemaal niet - heel erg                | Not at all - very much                  | Hedonia                                                                          | [18]              |
|                                                    | Vandaag vond ik mijn dag de moeite waard*                                                                 | Today, I felt my day was worth living*                                                                               | Helemaal niet - heel erg                | Not at all - very much                  | Depression                                                                       | [18, 31]          |
| <b>Standard last item of the EMA questionnaire</b> | Als u nog iets anders over de periode sinds het vorige meetmoment wilt noteren, dan kunt u dat hier doen. | If you would like to note down something else about the period since the previous measurement, you can do that here. | [String (optioneel), max 280 karakters] | [String (optional), max 280 characters] | Qualitative description of anything of relevance not captured by the other items |                   |
| <u>Main construct: (Hypo)mania</u>                 |                                                                                                           |                                                                                                                      |                                         |                                         |                                                                                  |                   |
| Subconstruct                                       | EMA item (NL)                                                                                             | EMA item (EN)                                                                                                        | Response scale (NL)                     | Response scale (EN)                     | Construct                                                                        | Reference         |
| <b>(Hypo)mania</b>                                 | Vandaag was mijn stemming...*                                                                             | Today, my mood was...*                                                                                               | Depressief – manisch                    | Depressed – manic                       | LifeChart                                                                        | Adapted from [32] |
|                                                    | Vandaag heb ik veel gekocht*                                                                              | Today, I bought a lot*                                                                                               | Helemaal niet - heel erg                | Not at all - very much                  | Buying urge                                                                      | [21]              |
|                                                    | Vandaag was ik de hele dag aan het praten*                                                                | Today, I was talking all day*                                                                                        | Helemaal niet - heel erg                | Not at all - very much                  | Talking urge                                                                     | [14]              |
|                                                    | Vandaag deed ik dingen in een opwelling*                                                                  | Today, I was impulsive*                                                                                              | Helemaal niet - heel erg                | Not at all - very much                  | Impulsivity                                                                      | [18]              |
| <u>Main construct: Agitation and stress</u>        |                                                                                                           |                                                                                                                      |                                         |                                         |                                                                                  |                   |

| <b>Subconstruct</b>     | <b>EMA item (NL)</b>                                | <b>EMA item (EN)</b>                | <b>Response scale (NL)</b> | <b>Response scale (EN)</b> | <b>Construct</b>                       | <b>Reference</b> |
|-------------------------|-----------------------------------------------------|-------------------------------------|----------------------------|----------------------------|----------------------------------------|------------------|
| <b>Agitation</b>        | Vandaag voelde ik me onrustig                       | Today, I felt restless              | Helemaal niet - heel erg   | Not at all - very much     | Restlessness                           | [18, 31]         |
|                         | Vandaag was ik geïrriteerd                          | Today, I felt irritated             | Helemaal niet - heel erg   | Not at all - very much     | Externalizing behavior                 | [18, 31]         |
|                         | Vandaag was ik opstandig                            | Today, I felt rebellious            | Helemaal niet - heel erg   | Not at all - very much     | Externalizing behavior                 | [18]             |
|                         | Vandaag was ik ongeduldig*                          | Today, I felt impatient*            | Helemaal niet - heel erg   | Not at all - very much     | Externalizing behavior                 | [18]             |
|                         | Vandaag was ik dwars*                               | Today, I was recalcitrant*          | Helemaal niet - heel erg   | Not at all - very much     | Externalizing behavior                 | [18]             |
|                         | Vandaag deed ik dingen in een opwelling*            | Today, I was impulsive*             | Helemaal niet - heel erg   | Not at all - very much     | Impulsivity                            | [18]             |
|                         | Vandaag verveelde ik me snel*                       | Today, I was bored quickly*         | Helemaal niet - heel erg   | Not at all - very much     | Externalizing behavior                 | [18]             |
| <b>Over-stimulation</b> | Vandaag kwam alles harder binnen*                   | Today, I felt overstimulated*       | Helemaal niet - heel erg   | Not at all - very much     | Over-stimulation                       | [18]             |
|                         | Vandaag had ik het gevoel de controle te verliezen* | Today, I felt I was losing control* | Helemaal niet - heel erg   | Not at all - very much     | Losing control                         | [18]             |
|                         | Vandaag raakte ik gauw van slag*                    | Today, I was easily upset*          | Helemaal niet - heel erg   | Not at all - very much     | Rigidity                               | [18]             |
|                         | Vandaag schrok ik snel*                             | Today, I was easily startled*       | Helemaal niet - heel erg   | Not at all - very much     | Increased startle response/hyper focus | [18]             |
| <b>Stress</b>           | Vandaag raakte ik gauw van slag                     | Today, I was easily upset           | Helemaal niet - heel erg   | Not at all - very much     | Rigidity                               | [18]             |
|                         | Vandaag schrok ik snel                              | Today, I was easily startled        | Helemaal niet - heel erg   | Not at all - very much     | Increased startle response/hyper focus | [18]             |

|                                                        | Vandaag stoorden anderen zich aan mij                                                       | Today, others were annoyed by me                | Helemaal niet - heel erg   | Not at all - very much     | Annoys others               | [18]             |
|--------------------------------------------------------|---------------------------------------------------------------------------------------------|-------------------------------------------------|----------------------------|----------------------------|-----------------------------|------------------|
| <b>Main construct: Anxiety</b>                         |                                                                                             |                                                 |                            |                            |                             |                  |
| <b>Subconstruct</b>                                    | <b>EMA item (NL)</b>                                                                        | <b>EMA item (EN)</b>                            | <b>Response scale (NL)</b> | <b>Response scale (EN)</b> | <b>Construct</b>            | <b>Reference</b> |
| <b>Anxiety</b>                                         | Vandaag heb ik iets afgezegd of vermeden                                                    | Today, I have cancelled or avoided something    | Helemaal niet - heel erg   | Not at all - very much     | Avoidance                   | [18]             |
|                                                        | Vandaag heb ik contact opgenomen met veilige personen*                                      | Today, I have contacted safe persons*           | Helemaal niet - heel erg   | Not at all - very much     | Safety behavior             | [21]             |
|                                                        | Vandaag voelde ik me veilig                                                                 | Today, I felt safe                              | Helemaal niet - heel erg   | Not at all - very much     | Feeling safe                | [21]             |
|                                                        | Vandaag voelde ik me vreemd                                                                 | Today, I felt strange                           | Helemaal niet - heel erg   | Not at all - very much     | Dissociation/ derealization | [18]             |
| <b>Main construct: Psychosis</b>                       |                                                                                             |                                                 |                            |                            |                             |                  |
| <b>Subconstruct</b>                                    | <b>EMA item (NL)</b>                                                                        | <b>EMA item (EN)</b>                            | <b>Response scale (NL)</b> | <b>Response scale (EN)</b> | <b>Construct</b>            | <b>Reference</b> |
| <b>Delusions</b>                                       | Op dit moment voel ik me veilig                                                             | Right now, I feel safe                          | Helemaal niet - heel erg   | Not at all - very much     | Paranoid delusion           | [18]             |
|                                                        | Op dit moment voel ik me wantrouwig                                                         | Right now, I feel suspicious                    | Helemaal niet - heel erg   | Not at all - very much     | Paranoid delusion           | [18]             |
|                                                        | Op dit moment voel ik me vreemd                                                             | Right now, I feel strange                       | Helemaal niet - heel erg   | Not at all - very much     | Dissociation/ derealization | [18]             |
| <b>Main construct: Reduced interest and initiative</b> |                                                                                             |                                                 |                            |                            |                             |                  |
| <b>Subconstruct</b>                                    | <b>EMA item (NL)</b>                                                                        | <b>EMA item (EN)</b>                            | <b>Response scale (NL)</b> | <b>Response scale (EN)</b> | <b>Construct</b>            | <b>Reference</b> |
| <b>Reduced interest and initiative</b>                 | Vandaag kon ik me nergens toe zetten*                                                       | Today, I could not bring myself to do anything* | Helemaal niet - heel erg   | Not at all - very much     | Initiative                  | [18]             |
|                                                        | Ik heb zin in morgen                                                                        | I look forward to tomorrow                      | Helemaal niet - heel erg   | Not at all - very much     | Reward anticipation         | [18, 31]         |
|                                                        | Ik zie op tegen iets wat binnenkort gebeurt (een bepaalde situatie, activiteit, ontmoeting) | I'm dreading something that will happen soon    | Helemaal niet - heel erg   | Not at all - very much     | Stress anticipation         | [18]             |



| <b>Main construct: Bodily complaints</b> |                                                                       |                                                  |                                                                                                                                                                                                                                                                                                                                                                                                                                                       |                                                                                                                                                                                                                                                                                                                                                                                                        |                                      |                   |
|------------------------------------------|-----------------------------------------------------------------------|--------------------------------------------------|-------------------------------------------------------------------------------------------------------------------------------------------------------------------------------------------------------------------------------------------------------------------------------------------------------------------------------------------------------------------------------------------------------------------------------------------------------|--------------------------------------------------------------------------------------------------------------------------------------------------------------------------------------------------------------------------------------------------------------------------------------------------------------------------------------------------------------------------------------------------------|--------------------------------------|-------------------|
| <b>Subconstruct</b>                      | <b>EMA item (NL)</b>                                                  | <b>EMA item (EN)</b>                             | <b>Response scale (NL)</b>                                                                                                                                                                                                                                                                                                                                                                                                                            | <b>Response scale (EN)</b>                                                                                                                                                                                                                                                                                                                                                                             | <b>Construct</b>                     | <b>Reference</b>  |
| <b>Bodily complaints</b>                 | Vandaag heb ik last gehad van:                                        | Today, I have been bothered by:                  | <b>Checklist (meerdere opties mogelijk):</b><br>- Ademhalingsproblemen (kortademigheid, moeilijk adem kunnen krijgen)<br>- Pijn of drukkend gevoel op de borst<br>- Hartkloppingen<br>- Misselijkheid of maag die van streek is<br>- Verstopping, dunne ontlasting of diarree<br>- Pijn in de buik of maagstreek<br>- Hoofdpijn<br>- Duizeligheid<br>- Vermoeidheid<br>- Rugpijn<br>- Pijn in spieren of gewrichten<br>- Verdoofd of tintelend gevoel | <b>Checklist (multiple responses possible):</b><br>- Trouble breathing (shortness of breath, breathing difficulties)<br>- Pain or pressing feeling on the chest<br>- Heart palpitations<br>- Nausea or upset stomach<br>- Constipation, diarrhea<br>- Abdominal pain or stomachaches<br>- Headache<br>- Dizziness<br>- Fatigue<br>- Back pain<br>- Pain in joints or muscles<br>- Numbness or tingling | Bodily complaints                    | Adapted from [24] |
| (for each selected complaint)            | Hoeveel had je last van [klacht]                                      | How much were you bothered by [complaint]        | Helemaal niet - heel erg                                                                                                                                                                                                                                                                                                                                                                                                                              | Not at all - very much                                                                                                                                                                                                                                                                                                                                                                                 | Bodily complaints                    | [25]              |
|                                          | Vandaag was ik in gedachten veel met mijn lichamelijke klachten bezig | Today, I was preoccupied by my bodily complaints | Helemaal niet - heel erg                                                                                                                                                                                                                                                                                                                                                                                                                              | Not at all - very much                                                                                                                                                                                                                                                                                                                                                                                 | Preoccupation with bodily complaints | [25]              |

|                               | Vandaag kon ik mijn lichamelijke klachten goed accepteren                                                      | Today, I could accept my bodily complaints well                                                         | Helemaal niet - heel erg                | Not at all - very much                  | Acceptance of bodily complaints             | [25]                  |
|-------------------------------|----------------------------------------------------------------------------------------------------------------|---------------------------------------------------------------------------------------------------------|-----------------------------------------|-----------------------------------------|---------------------------------------------|-----------------------|
|                               | Vandaag gaven mijn lichamelijke klachten mij een gevoel van falen*                                             | Today, my bodily complaints made me feel like a failure*                                                | Helemaal niet - heel erg                | Not at all - very much                  | Feeling of failure due to bodily complaints | [25]                  |
|                               | Vandaag schaamde ik mij voor mijn lichamelijke klachten*                                                       | Today, I felt ashamed for my bodily complaints*                                                         | Helemaal niet - heel erg                | Not at all - very much                  | Feeling ashamed of bodily complaints        | [25]                  |
| <b>Main construct: Events</b> |                                                                                                                |                                                                                                         |                                         |                                         |                                             |                       |
| <b>Subconstruct</b>           | <b>EMA item (NL)</b>                                                                                           | <b>EMA item (EN)</b>                                                                                    | <b>Response scale (NL)</b>              | <b>Response scale (EN)</b>              | <b>Construct</b>                            | <b>Reference</b>      |
| <b>Events</b>                 | Vandaag heb ik leuke dingen gedaan*                                                                            | Today, I did fun things*                                                                                | Helemaal niet – heel erg                | Not at all – very much                  | Having fun                                  | [21]                  |
|                               | Denk aan de meest plezierige gebeurtenis of activiteit sinds het vorige meetmoment. Hoe plezierig was dit?     | Think of the most pleasant event or activity since the previous measurement. How pleasurable was this?  | Helemaal niet - heel erg plezierig      | Not at all - very pleasant              | Reward sensitivity                          | Adapted from [11, 19] |
|                               | De plezierige ervaring had te maken met:                                                                       | The pleasant event concerned:                                                                           | [String (optioneel), max 280 karakters] | [String (optional), max 280 characters] | Qualitative description of event            | [11, 19]              |
|                               | Denk aan de meest onplezierige gebeurtenis of activiteit sinds het vorige meetmoment. Hoe onplezierig was dit? | Think of the most unpleasant event or activity since the previous measurement. How unpleasant was this? | Helemaal niet - heel erg onplezierig    | Not at all – very unpleasant            | Stress reactivity                           | Adapted from [11, 19] |
|                               | De onplezierige gebeurtenis had te maken met                                                                   | The unpleasant event concerned:                                                                         | [String (optioneel), max 280 karakters] | [String (optional), max 280 characters] | Qualitative description of event            | [11]                  |

| <b>Main construct: Worrying</b>                   |                                                                |                                                        |                            |                            |                  |                   |
|---------------------------------------------------|----------------------------------------------------------------|--------------------------------------------------------|----------------------------|----------------------------|------------------|-------------------|
| <b>Subconstruct</b>                               | <b>EMA item (NL)</b>                                           | <b>EMA item (EN)</b>                                   | <b>Response scale (NL)</b> | <b>Response scale (EN)</b> | <b>Construct</b> | <b>Reference</b>  |
| <b>Worrying</b>                                   | Vandaag maakte ik me zorgen                                    | Today, I have worried                                  | Helemaal niet - heel erg   | Not at all - very much     | Worrying         | [18]              |
|                                                   | Vandaag was ik er met mijn hoofd niet bij*                     | Today, I was absentminded*                             | Helemaal niet - heel erg   | Not at all - very much     | Absentminded     | [18]              |
|                                                   | Vandaag kon ik moeilijk beslissingen nemen*                    | Today, I had difficulty making decisions               | Helemaal niet - heel erg   | Not at all - very much     | Indecisiveness   | [18]              |
| <b>Main construct: Self-esteem</b>                |                                                                |                                                        |                            |                            |                  |                   |
| <b>Subconstruct</b>                               | <b>EMA item (NL)</b>                                           | <b>EMA item (EN)</b>                                   | <b>Response scale (NL)</b> | <b>Response scale (EN)</b> | <b>Construct</b> | <b>Reference</b>  |
| <b>Zelfbeeld</b>                                  | Vandaag had ik vertrouwen in mezelf                            | Today, I trusted in myself                             | Helemaal niet - heel erg   | Not at all - very much     | Self-esteem      | [18]              |
|                                                   | Vandaag was ik bang om dingen fout te doen*                    | Today, I was afraid of making mistakes*                | Helemaal niet - heel erg   | Not at all - very much     | Perfectionism    | [18]              |
|                                                   | Vandaag had ik het gevoel dat anderen mij mochten*             | Today, I felt others liked me*                         | Helemaal niet - heel erg   | Not at all - very much     | Self-esteem      | [18]              |
| <b>Main construct: Functioning and resilience</b> |                                                                |                                                        |                            |                            |                  |                   |
| <b>Subconstruct</b>                               | <b>EMA item (NL)</b>                                           | <b>EMA item (EN)</b>                                   | <b>Response scale (NL)</b> | <b>Response scale (EN)</b> | <b>Construct</b> | <b>Reference</b>  |
| <b>Functioning</b>                                | Vandaag voelde ik mij belemmerd door mijn psychische klachten* | Today, I felt hindered by my psychological complaints* | Helemaal niet - heel erg   | Not at all - very much     | Feeling burdened | Adapted from [33] |
|                                                   | Vandaag kon ik aan wat er op mijn pad kwam*                    | Today, I could handle what was thrown my way*          | Helemaal niet - heel erg   | Not at all - very much     | Resilience       | [31]              |
|                                                   | Vandaag ervoer ik grip op hoe het met me gaat*                 | Today, I felt in control of my well-being*             | Helemaal niet - heel erg   | Not at all - very much     | Self-management  | [11]              |
|                                                   | Vandaag heb ik leuke dingen gedaan*                            | Today, I did fun things*                               | Helemaal niet - heel erg   | Not at all - very much     | Having fun       | [21]              |

|                   |                                             |                                               |                          |                        |            |      |
|-------------------|---------------------------------------------|-----------------------------------------------|--------------------------|------------------------|------------|------|
| <b>Resilience</b> | Vandaag kon ik aan wat er op mijn pad kwam* | Today, I could handle what was thrown my way* | Helemaal niet - heel erg | Not at all - very much | Resilience | [31] |
|                   | Op dit moment accepteer ik me zoals ik ben* | Right now, I accept myself the way I am*      | Helemaal niet - heel erg | Not at all - very much |            | [11] |

**Main construct: Sleep during the day**

| <b>Subconstruct</b>         | <b>EMA item (NL)</b>                   | <b>EMA item (EN)</b>               | <b>Response scale (NL)</b> | <b>Response scale (EN)</b> | <b>Construct</b>  | <b>Reference</b> |
|-----------------------------|----------------------------------------|------------------------------------|----------------------------|----------------------------|-------------------|------------------|
| <b>Sleep during the day</b> | Hoe vaak heb ik vandaag dutjes gedaan? | Today, how often did I take a nap? | [Vul getal in]             | [Enter number]             | Sleep disturbance | [34]             |
|                             | Hoe lang heb ik vandaag dutjes gedaan? | Today, how long did I take naps?   | [Vul getal in (minuten)]   | [Enter number (minutes)]   | Sleep disturbance | [34]             |

**Main construct: Formulate your own questions**

| <b>Subconstruct</b>                 | <b>EMA item (NL)</b>                                                              | <b>EMA item (EN)</b>                                                          | <b>Response scale (NL)</b> | <b>Response scale (EN)</b> | <b>Construct</b>     | <b>Reference</b> |
|-------------------------------------|-----------------------------------------------------------------------------------|-------------------------------------------------------------------------------|----------------------------|----------------------------|----------------------|------------------|
| <b>Formulate your own questions</b> | - Op dit moment [typ hier je eigen vraag]<br>- Vandaag [typ hier je eigen vraag]* | - Right now [enter your question here]<br>- Today [enter your question here]* | Helemaal niet - heel erg   | Not at all - very much     | Person-specific item | [21]             |
|                                     | - Op dit moment [typ hier je eigen vraag]<br>- Vandaag [typ hier je eigen vraag]  | - Right now [enter your question here]<br>- Today [enter your question here]  | Helemaal niet - heel erg   | Not at all - very much     | Person-specific item | [21]             |
|                                     | - Op dit moment [typ hier je eigen vraag]<br>- Vandaag [typ hier je eigen vraag]  | - Right now [enter your question here]<br>- Today [enter your question here]  | Helemaal niet - heel erg   | Not at all - very much     | Person-specific item | [21]             |

Note. The once-per-day schedules often are an insightful addition to the semi-random and fixed EMA schedules. Therefore, the PETRA decision aid has integrated some of the items of the once-per-day-schedules in the relevant (sub)constructs of the more frequent EMA schedules. These items are marked by \* in the once-per-day schedule.

**Once-per-day morning schedule**  
**Constructs, subconstructs, and EMA items**

| <b>Main construct: Sleep</b> |                                                                       |                                                            |                            |                             |                          |                   |
|------------------------------|-----------------------------------------------------------------------|------------------------------------------------------------|----------------------------|-----------------------------|--------------------------|-------------------|
| Subconstruct                 | EMA item (NL)                                                         | EMA item (EN)                                              | Response scale (NL)        | Response scale (EN)         | Construct                | Reference         |
| <b>Sleep</b>                 | Hoe was de kwaliteit van mijn slaap?*                                 | What was the quality of my sleep?*                         | Zeer slecht – zeer goed    | Not at all - very much      | Sleep quality            | [2]               |
|                              | Ik heb gepiekerd voor ik in slaap viel?*                              | I worried before falling asleep?*                          | Helemaal niet - heel erg   | Not at all - very much      | Sleep-related worrying   | Adapted from [34] |
|                              | Hoe laat ging ik naar bed?*                                           | At what time did I go to bed?*                             | [selecteer tijdstip]       | [select time]               | Calculate sleep duration | Adapted from [34] |
|                              | Hoe laat probeerde ik in slaap te vallen?*                            | At what time did I try to fall asleep?*                    | [selecteer tijdstip]       | [select time]               | Calculate sleep duration | Adapted from [34] |
|                              | Hoe lang duurde het voordat ik in slaap viel?*                        | How long did it take before I fell asleep?*                | [geef getal aan (minuten)] | [indicate number (minutes)] | Calculate sleep duration | Adapted from [34] |
|                              | Hoe vaak werd ik wakker, mijn uiteindelijke ontwaken niet meegeteld?* | How often did I wake, not counting my eventual awakening?* | [geef getal aan]           | [indicate number]           | Awakenings               | Adapted from [34] |
|                              | Hoe lang ben ik in totaal wakker geweest?*                            | How long have I been awake in total?*                      | [geef getal aan (minuten)] | [indicate number (minutes)] | Awakenings               | Adapted from [34] |
|                              | Hoe laat werd ik uiteindelijk wakker?*                                | At what time did I eventually wake up?*                    | [selecteer tijdstip]       | [select time]               | Calculate sleep duration | Adapted from [34] |
|                              | Hoe laat ben ik opgestaan?*                                           | At what time did I go out of bed?*                         | [selecteer tijdstip]       | [select time]               | Calculate sleep duration | Adapted from [34] |
| <b>Main construct: Mood</b>  |                                                                       |                                                            |                            |                             |                          |                   |
| Subconstruct                 | EMA item (NL)                                                         | EMA item (EN)                                              | Response scale (NL)        | Response scale (EN)         | Construct                | Reference         |
| <b>Mood</b>                  | Op dit moment voel ik me opgewekt                                     | Right now, I feel cheerful                                 | Helemaal niet - heel erg   | Not at all - very much      | PA high arousal          | [2, 8-12]         |
|                              | Op dit moment voel ik me somber                                       | Right now, I feel down                                     | Helemaal niet - heel erg   | Not at all - very much      | NA low arousal           | [8-13]            |
|                              | Op dit moment voel ik me tevreden                                     | Right now, I feel content                                  | Helemaal niet - heel erg   | Not at all - very much      | PA low arousal           | [2, 8-12]         |

|  |                                      |                             |                          |                        |                 |            |
|--|--------------------------------------|-----------------------------|--------------------------|------------------------|-----------------|------------|
|  | Op dit moment voel ik me geïrriteerd | Right now, I feel irritated | Helemaal niet - heel erg | Not at all - very much | NA high arousal | [2, 10-13] |
|  | Op dit moment voel ik me energiek    | Right now, I feel energetic | Helemaal niet - heel erg | Not at all - very much | PA high arousal | [8-12]     |
|  | Op dit moment voel ik me onrustig    | Right now, I feel restless  | Helemaal niet - heel erg | Not at all - very much | NA high arousal | [8-11]     |

| <b>Main construct: Formulate your own questions</b> |                                           |                                        |                            |                            |                                |                  |
|-----------------------------------------------------|-------------------------------------------|----------------------------------------|----------------------------|----------------------------|--------------------------------|------------------|
| <b>Subconstruct</b>                                 | <b>EMA item (NL)</b>                      | <b>EMA item (EN)</b>                   | <b>Response scale (NL)</b> | <b>Response scale (EN)</b> | <b>Construct</b>               | <b>Reference</b> |
| <b>Formulate your own questions</b>                 | - Op dit moment [typ hier je eigen vraag] | - Right now [enter your question here] | Helemaal niet - heel erg   | Not at all - very much     | Person-specific item (evening) | [21]             |
|                                                     | - Op dit moment [typ hier je eigen vraag] | - Right now [enter your question here] | Helemaal niet - heel erg   | Not at all - very much     | Person-specific item (evening) | [21]             |
|                                                     | - Op dit moment [typ hier je eigen vraag] | - Right now [enter your question here] | Helemaal niet - heel erg   | Not at all - very much     | Person-specific item (evening) | [21]             |

Note. The once-per-day schedules often are an insightful addition to the semi-random and fixed EMA schedules. Therefore, the PETRA decision aid has integrated some of the items of the once-per-day-schedules in the relevant (sub)constructs of the more frequent EMA schedules. These items are marked by \* in the once-per-day schedule

## References

1. Bos FM, Snippe E, Bruggeman R, Wichers M, van der Krieke L. Insights of patients and clinicians on the promise of the experience sampling method for psychiatric care. *Psychiatric Services*. 2019;70(11):983-91.
2. Bos FM, Snippe E, Bruggeman R, Doornbos B, Wichers M, van der Krieke L. Recommendations for the use of long-term experience sampling in bipolar disorder care: A qualitative study of patient and clinician experiences. *International Journal of Bipolar Disorders*. 2020;8(1):1-14. doi: <https://doi.org/10.1186/s40345-020-00201-5>.
3. Eisele E, Kasanova Z, Houben M. Questionnaire design and evaluation. In: Myin-Germeys I, Kuppens P, editors. *The open handbook of experience sampling methodology: A step-by-step guide to designing, conducting, and analyzing ESM studies*. Leuven2021.
4. Vachon H, Viechtbauer W, Rintala A, Myin-Germeys I. Compliance and Retention With the Experience Sampling Method Over the Continuum of Severe Mental Disorders: Meta-Analysis and Recommendations. *JMedInternet Res*. 2019;21(12):e14475.
5. Eisele G, Vachon H, Lafit G, Kuppens P, Houben M, Myin-Germeys I, et al. The effects of sampling frequency and questionnaire length on perceived burden, compliance, and careless responding in experience sampling data in a student population. *Assessment*. 2022;29(2):136-51.
6. Janssens KA, Bos EH, Rosmalen JG, Wichers MC, Riese H. A qualitative approach to guide choices for designing a diary study. *BMC Medical Research and Methodology*. 2018;18(1):1-12.
7. Palmier-Claus JE, Myin-Germeys I, Barkus E, Bentley L, Udachina A, Delespaul P, et al. Experience sampling research in individuals with mental illness: reflections and guidance. *Acta PsychiatrScand*. 2011;123(1):12.
8. Kramer I, Simons CJP, Hartmann JA, Menne-Lothmann C, Viechtbauer W, Peeters F, et al. A therapeutic application of the experience sampling method in the treatment of depression: a randomized controlled trial. *World Psychiatry*. 2014 02;13(1):68. PMID: 24497255. doi: 10.1002/wps.20090.
9. van der Krieke L, Jeronimus BF, Blaauw FJ, Wanders RBK, Emerencia AC, Schenk HM, et al. HowNutsAreTheDutch ((HoeGeklsNL): A crowdsourcing study of mental symptoms and strengths. *International Journal of Methods in Psychiatric Research*. 2016 06;25(2):123. PMID: 2015-44271-001. doi: 10.1002/mpr.1495.
10. Helmich MA, Snippe E, Kunkels YK, Riese H, Smit A, Wichers M. Transitions in Depression (TRANS-ID) Recovery: Study protocol for a repeated intensive longitudinal n= 1 study design to search for personalized early warning signals of critical transitions towards improvement in depression. 2021.
11. Riese H, Von Klipstein L, Schoevers R, van der Veen D, Servaas M. Personalized ESM monitoring and feedback to support psychological treatment for depression: a pragmatic randomized controlled trial (Therap-i). *BMC Psychiatry*. 2021;21(1):1-11.
12. Schoevers R, Van Borkulo C, Lamers F, Servaas M, Bastiaansen J, Beekman A, et al. Affect fluctuations examined with ecological momentary assessment in patients with current or remitted depression and anxiety disorders. *PsycholMed*. 2021;51(11):1906-15.
13. Reininghaus U, Kempton MJ, Valmaggia L, Craig TK, Garety P, Onyejiaka A, et al. Stress sensitivity, aberrant salience, and threat anticipation in early psychosis: an experience sampling study. *SchizophrBull*. 2016;42(3):712-22.

14. Knapen SE. Rhythm & Blues: Chronobiology in the Pathophysiology and Treatment of Mood Disorders: Rijksuniversiteit Groningen; 2019.
15. Tyler E, Jones S, Black N, Carter L-A, Barrowclough C. The relationship between bipolar disorder and cannabis use in daily life: An experience sampling study. *PLoS One*. 2015;10(3).
16. Myin-Germeys I, Peeters F, Havermans R, Nicolson NA, deVries MW, Delespaul P, et al. Emotional reactivity to daily life stress in psychosis and affective disorder: An experience sampling study. *Acta Psychiatr Scand*. 2003 02;107(2):124. PMID: 2003-04279-005. PMID: 12534438. doi: 10.1034/j.1600-0447.2003.02025.x.
17. Barrantes-Vidal N, Chun CA, Myin-Germeys I, Kwapil TR. Psychometric schizotypy predicts psychotic-like, paranoid, and negative symptoms in daily life. *J Abnorm Psychol*. 2013;122(4):1077.
18. Schreuder MJ, Groen RN, Wigman JT, Hartman CA, Wichers M. Measuring psychopathology as it unfolds in daily life: addressing key assumptions of intensive longitudinal methods in the TRAILS TRANS-ID study. *BMC Psychiatry*. 2020;20(1):1-14.
19. Kroeze R, van der Veen DC, Servaas MN, Bastiaansen JA, Oude Voshaar R, Borsboom D, et al. Personalized feedback on symptom dynamics of psychopathology: a proof-of-principle study. *Journal for Person-Oriented Research*. 2017;3(1):1-7. doi: 10.17505/jpor.2017.01.
20. Oorschot M, Kwapil T, Delespaul P, Myin-Germeys I. Momentary assessment research in psychosis. *Psychol Assess*. 2009 12;21(4):498. PMID: 2009-22537-005. PMID: 19947784. doi: 10.1037/a0017077.
21. Bos FM, von Klipstein L, Riese H. EMA diary items developed in PETRA pilots with clients and clinicians (2017-2021). Unpublished work. 2021.
22. Jenner JA G-JB. Groninger Lijst Omgaan met Stemmen (GLOS). Hallucinaties: Kenmerken, verklaringen, behandeling. Assen, The Netherlands: van Gorcum; 2006. p. 219-22.
23. Bos FM. Ecological Momentary Assessment as a clinical tool in psychiatry: Promise, possibilities, and pitfalls. Groningen, The Netherlands: University of Groningen; 2021.
24. Zijlema WL, Stolk RP, Löwe B, Rief W, White PD, Rosmalen JG. How to assess common somatic symptoms in large-scale studies: a systematic review of questionnaires. *J Psychosom Res*. 2013;74(6):459-68.
25. Rosmalen JG, van Gils A, Mesa MAA, Schoevers RA, Monden R, Hanssen DJ. Development of Grip self-help: An online patient-tailored self-help intervention for functional somatic symptoms in primary care. *Internet Interventions*. 2020;19:100297.
26. Wichers M, Peeters F, Rutten BPF, Jacobs N, Derom C, Thiery E, et al. A time-lagged momentary assessment study on daily life physical activity and affect. *Health Psychology*. 2012 03;31(2):135. PMID: 2011-22910-001. doi: 10.1037/a0025688.
27. Bringmann LF, Booij SH, Elmer T, Langener A, Stadel M, Bos FM. EMA items developed by LaBLab - in collaboration with iLab and PETRA and focus groups with clients (Unpublished work). 2021.
28. LaBLab. [www.laurabringmannlab.com](http://www.laurabringmannlab.com). [20-12-2021].
29. iLab. [https://ilab-psychiatry.nl/en\\_US/](https://ilab-psychiatry.nl/en_US/). [20-12-2021].
30. Myin-Germeys I, Krabbendam L, Delespaul PAEG, Van Os J. Do life events have their effect on psychosis by influencing the emotional reactivity to daily life stress? *Psychol Med*. 2003 02;33(2):327. PMID: 2003-00513-016. PMID: 12622311. doi: 10.1017/s0033291702006785.



31. Booij SH, Wichers M, De Jonge P, Sytema S, Van Os J, Wunderink L, et al. Study protocol for a prospective cohort study examining the predictive potential of dynamic symptom networks for the onset and progression of psychosis: the Mapping Individual Routes of Risk and Resilience (Mirorr) study. *BMJ Open*. 2018;8(1):e019059.
32. Leverich GS, Post RM. The NIMH life chart manual for recurrent affective illness: The LCM. NIMH Monograph. 1993.
33. Schiepek G, Stöger-Schmidinger B, Kronberger H, Aichhorn W, Kratzer L, Heinz P, et al. The Therapy Process Questionnaire-Factor analysis and psychometric properties of a multidimensional self-rating scale for high-frequency monitoring of psychotherapeutic processes. *Clinical psychology & psychotherapy*. 2019;26(5):586-602.
34. Carney CE, Buysse DJ, Ancoli-Israel S, Edinger JD, Krystal AD, Lichstein KL, et al. The consensus sleep diary: standardizing prospective sleep self-monitoring. *Sleep*. 2012;35(2):287-302.
